# Supplementary material
Source: PubMed Central journal article supplement (PMC3535539)
Supplement: NIHMS392966-supplement-Supp_Table_S1.pdf [file NIHMS392966-supplement-Supp_Table_S1.pdf]

**Supplementary Table 1. Summary of Subject Genotyping Information**

| <b>Analysis Set/Derivation</b>           | <b>subjects</b> | <b>Platform</b> | <b>Quality<sup>a</sup></b> | <b>IBD<sup>b</sup></b> | <b>Gender</b> |
|------------------------------------------|-----------------|-----------------|----------------------------|------------------------|---------------|
| Discovery EOMG Sweden                    | 189             | Illumina 370K   | 10                         | 1                      | 2             |
| Discovery EOMG England                   | 121             | Illumina 370K   | 3                          | 1                      | 0             |
| Discovery EOMG France                    | 118             | Illumina 370K   | 0                          | 3                      | 0             |
| Discovery EOMG Norway                    | 26              | Illumina 370K   | 0                          | 0                      | 0             |
| <b>Total Discovery EOMG Cases</b>        | <b>454</b>      |                 |                            |                        |               |
| Replication EOMG Swedish                 | 10              | Illumina 610K   | 0                          | 0                      | 0             |
| Replication EOMG English                 | 128             | Illumina 610K   | 10                         | 0                      | 5             |
| Replication EOMG German                  | 26              | Illumina 610K   | 0                          | 0                      | 1             |
| Replication EOMG Netherlands             | 46              | Illumina 610K   | 0                          | 0                      | 0             |
| Replication EOMG Norway                  | 76              | Illumina 610K   | 1                          | 4                      | 5             |
| <b>Total Replication EOMG Cases</b>      | <b>286</b>      |                 |                            |                        |               |
| <b>Discovery Controls</b>                | <b>subjects</b> | <b>Platform</b> | <b>Quality<sup>a</sup></b> | <b>IBD<sup>b</sup></b> | <b>Gender</b> |
| Sweden                                   | 570             | Illumina 550K   | 0                          | 0                      | 0             |
| British 1958 Blood Bank                  | 1355            | Illumina 550K   | 19                         | 13                     | 0             |
| New York Cancer Project                  | 1834            | Illumina 550K   | 10                         | 10                     | 4             |
| Norway <sup>f</sup>                      | 123             | Illumina 550K   | 4                          | 0                      | 0             |
| Childrens Hospital of Philadelphia       | 1453            | Illumina 550K   | 23                         | 47                     | 0             |
| NIH Laboratory of Neurogenetics          | 170             | Illumina 550K   | 0                          | 0                      | 0             |
| <b>Total</b>                             | <b>5505</b>     |                 |                            |                        |               |
| Replication Sweden Controls <sup>g</sup> | 678             | Illumina 1Mb    | 4                          | 2                      | 0             |
| WTCCC Controls                           | 2737            | Illumina 1Mb    | 19                         | 58                     | 0             |
| <b>Total</b>                             | <b>3415</b>     |                 |                            |                        |               |

a. Less than 95% complete genotypes

b. Exclusion for relatedness based on identity by state analyses ( $PI^{\wedge} > 0.15$  assessed using PLINK IBD)

c. >10% nonEuropean admixture (see Supplementary Methods)

d. Based on PCA analyses (see Supplementary Methods)

e. Final set after exclusion or after best 4:1 match for controls (see Supplementary Methods).

f. Samples collected in Norway and genotyped in current study at North Shore.

g. Samples collected and genotyped in Sweden for population controls in myocardial infarction study.

| non-European <sup>c</sup> | 4 SD PCA <sup>d</sup> | Final Set <sup>e</sup> |
|---------------------------|-----------------------|------------------------|
| 9                         | 5                     | 162                    |
| 3                         | 1                     | 113                    |
| 16                        | 0                     | 99                     |
| 0                         | 0                     | 26                     |
|                           |                       | 400                    |
| 0                         | 0                     | 10                     |
| 2                         | 4                     | 107                    |
| 0                         | 0                     | 25                     |
| 2                         | 1                     | 43                     |
| 0                         | 2                     | 64                     |
|                           |                       | 249                    |

| non-European <sup>c</sup> | 4 SD PCA <sup>d</sup> | 4:1 match cases <sup>e</sup> |
|---------------------------|-----------------------|------------------------------|
| 5                         | 5                     | 535                          |
| 18                        | 15                    | 292                          |
| 115                       | 20                    | 310                          |
| 0                         | 4                     | 98                           |
| 169                       | 10                    | 305                          |
| 16                        | 5                     | 60                           |
|                           |                       | 1600                         |
| 6                         | 23                    | 309                          |
| 38                        | 13                    | 687                          |
|                           |                       | 996                          |

).
