# Supplementary material
Source: PubMed Central journal article supplement (PMC3535539)
Supplement: NIHMS392966-supplement-Supp_Table_S2.pdf [file NIHMS392966-supplement-Supp_Table_S2.pdf]

**Supplementary Table 1. Summary of Association Tests for SNPs with p values < 5E-04<sup>a</sup>**

| rs number  | Chr | Position <sup>b</sup> | Allele A <sup>c</sup> | Allele B <sup>c</sup> | ALL MAF Cases <sup>d</sup> | All MAF Controls <sup>d</sup> | ALL p-value <sup>e</sup> | OR <sup>f</sup> |
|------------|-----|-----------------------|-----------------------|-----------------------|----------------------------|-------------------------------|--------------------------|-----------------|
| rs9786944  | 1   | 5471099               | A                     | G                     | 0.08                       | 0.06                          | 4.2E-04                  | 1.51            |
| rs3935435  | 1   | 6494762               | A                     | G                     | 0.26                       | 0.21                          | 1.1E-04                  | 1.32            |
| rs671101   | 1   | 32108685              | G                     | A                     | 0.27                       | 0.22                          | 1.7E-04                  | 1.31            |
| rs706497   | 1   | 52887324              | G                     | A                     | 0.39                       | 0.33                          | 4.7E-05                  | 1.30            |
| rs6685516  | 1   | 62114818              | A                     | G                     | 0.18                       | 0.23                          | 4.8E-04                  | 0.75            |
| rs1260773  | 1   | 64307510              | A                     | G                     | 0.44                       | 0.38                          | 2.0E-04                  | 1.26            |
| rs4839556  | 1   | 111063863             | A                     | G                     | 0.17                       | 0.22                          | 3.6E-04                  | 0.75            |
| rs1999511  | 1   | 111123942             | A                     | C                     | 0.27                       | 0.22                          | 6.6E-05                  | 1.33            |
| rs4839335  | 1   | 114035394             | G                     | A                     | 0.30                       | 0.25                          | 3.2E-04                  | 1.28            |
| rs1230647  | 1   | 114055162             | G                     | A                     | 0.30                       | 0.25                          | 3.8E-04                  | 1.28            |
| rs2797409  | 1   | 114131725             | G                     | A                     | 0.30                       | 0.25                          | 2.6E-04                  | 1.29            |
| rs2476601  | 1   | 114179091             | A                     | G                     | 0.17                       | 0.11                          | <b>8.2E-10</b>           | 1.71            |
| rs1217407  | 1   | 114195271             | A                     | G                     | 0.30                       | 0.25                          | 2.4E-04                  | 1.29            |
| rs7529353  | 1   | 114221985             | A                     | G                     | 0.28                       | 0.24                          | 4.8E-04                  | 1.28            |
| rs2078371  | 1   | 115478706             | G                     | A                     | 0.15                       | 0.11                          | 1.8E-04                  | 1.40            |
| rs17362993 | 1   | 161580504             | A                     | G                     | 0.11                       | 0.15                          | 1.7E-04                  | 0.69            |
| rs1557121  | 1   | 171620504             | A                     | G                     | 0.20                       | 0.26                          | 7.7E-06                  | 0.71            |
| rs12044217 | 1   | 223969205             | A                     | G                     | 0.20                       | 0.16                          | 4.0E-04                  | 1.32            |
| rs728370   | 1   | 226970441             | G                     | A                     | 0.31                       | 0.26                          | 2.6E-04                  | 1.28            |
| rs241324   | 1   | 226983257             | A                     | G                     | 0.20                       | 0.15                          | 2.8E-04                  | 1.34            |
| rs644690   | 1   | 230571908             | A                     | G                     | 0.24                       | 0.29                          | 4.4E-04                  | 0.78            |
| rs1545255  | 2   | 24592914              | A                     | G                     | 0.25                       | 0.21                          | 3.7E-04                  | 1.30            |
| rs725238   | 2   | 43852686              | A                     | G                     | 0.34                       | 0.29                          | 3.7E-04                  | 1.27            |
| rs3762571  | 2   | 43853238              | C                     | A                     | 0.35                       | 0.29                          | 3.3E-04                  | 1.27            |
| rs12473962 | 2   | 44827874              | A                     | C                     | 0.29                       | 0.24                          | 3.5E-04                  | 1.29            |
| rs10204566 | 2   | 58853009              | G                     | A                     | 0.49                       | 0.42                          | 1.0E-05                  | 1.32            |
| rs6719884  | 2   | 58890420              | A                     | C                     | 0.48                       | 0.40                          | 2.7E-06                  | 1.35            |
| rs10865331 | 2   | 62404976              | A                     | G                     | 0.42                       | 0.37                          | 4.5E-04                  | 1.25            |
| rs2043092  | 2   | 73260584              | A                     | G                     | 0.12                       | 0.09                          | 1.3E-04                  | 1.46            |
| rs1029864  | 2   | 107150825             | A                     | G                     | 0.44                       | 0.38                          | 1.2E-04                  | 1.27            |
| rs2079917  | 2   | 107156923             | G                     | A                     | 0.41                       | 0.35                          | 3.6E-04                  | 1.25            |
| rs7421552  | 2   | 130320465             | G                     | A                     | 0.13                       | 0.09                          | 2.4E-05                  | 1.51            |
| rs1026290  | 2   | 173549681             | A                     | G                     | 0.42                       | 0.47                          | 4.6E-04                  | 0.80            |
| rs6752770  | 2   | 191681808             | G                     | A                     | 0.34                       | 0.29                          | 4.2E-04                  | 1.27            |
| rs1064213  | 2   | 198658485             | G                     | A                     | 0.45                       | 0.51                          | 1.6E-04                  | 0.79            |
| rs1389300  | 3   | 14861800              | A                     | G                     | 0.43                       | 0.37                          | 4.9E-04                  | 1.25            |
| rs9843745  | 3   | 24661552              | A                     | G                     | 0.54                       | 0.48                          | 1.9E-04                  | 1.26            |
| rs7610415  | 3   | 24666026              | A                     | G                     | 0.25                       | 0.20                          | 4.6E-04                  | 1.29            |
| rs9812637  | 3   | 24680225              | A                     | G                     | 0.54                       | 0.48                          | 1.9E-04                  | 1.26            |
| rs6550889  | 3   | 24693443              | A                     | C                     | 0.38                       | 0.33                          | 2.5E-04                  | 1.27            |
| rs6805565  | 3   | 119122889             | A                     | C                     | 0.16                       | 0.21                          | 1.4E-04                  | 0.73            |

|            |   |           |   |   |      |      |                |      |
|------------|---|-----------|---|---|------|------|----------------|------|
| rs12487554 | 3 | 124425472 | G | A | 0.43 | 0.37 | 8.5E-05        | 1.28 |
| rs3934729  | 3 | 124502453 | G | A | 0.44 | 0.38 | 2.8E-04        | 1.25 |
| rs231601   | 3 | 125865366 | A | G | 0.41 | 0.47 | 9.6E-05        | 0.78 |
| rs6808137  | 3 | 136792758 | A | G | 0.32 | 0.27 | 1.5E-04        | 1.29 |
| rs940050   | 3 | 157585584 | G | A | 0.15 | 0.19 | 4.3E-04        | 0.74 |
| rs10460872 | 3 | 168232433 | G | A | 0.38 | 0.32 | 2.3E-04        | 1.27 |
| rs10936665 | 3 | 172141713 | C | A | 0.13 | 0.09 | 1.1E-04        | 1.45 |
| rs917684   | 4 | 10961129  | G | A | 0.18 | 0.23 | 2.8E-04        | 0.75 |
| rs1562840  | 4 | 42533105  | G | A | 0.51 | 0.45 | 3.8E-05        | 1.30 |
| rs6850606  | 4 | 42559453  | A | G | 0.55 | 0.48 | 3.1E-06        | 1.35 |
| rs10012449 | 4 | 42559865  | A | C | 0.43 | 0.37 | 5.7E-05        | 1.30 |
| rs11726899 | 4 | 69680598  | G | A | 0.12 | 0.08 | 6.4E-05        | 1.49 |
| rs2272040  | 4 | 71041636  | G | A | 0.11 | 0.15 | 2.9E-04        | 0.70 |
| rs4235450  | 4 | 101429738 | G | A | 0.40 | 0.45 | 4.3E-04        | 0.80 |
| rs427983   | 4 | 108047450 | G | A | 0.27 | 0.32 | 3.3E-04        | 0.78 |
| rs4862110  | 4 | 183988023 | G | A | 0.23 | 0.18 | 1.7E-05        | 1.39 |
| rs10075972 | 5 | 23529713  | A | G | 0.19 | 0.23 | 3.8E-04        | 0.75 |
| rs1862573  | 5 | 37885445  | A | G | 0.05 | 0.08 | 1.1E-04        | 0.59 |
| rs1113266  | 5 | 51773170  | A | G | 0.46 | 0.41 | 4.8E-04        | 1.25 |
| rs37787    | 5 | 52677813  | A | G | 0.11 | 0.15 | 4.8E-04        | 0.72 |
| rs318791   | 5 | 55460229  | G | A | 0.33 | 0.38 | 4.5E-04        | 0.80 |
| rs1353747  | 5 | 58373238  | C | A | 0.07 | 0.10 | 4.5E-04        | 0.65 |
| rs7727675  | 5 | 118092024 | A | G | 0.12 | 0.16 | 8.6E-05        | 0.69 |
| rs982926   | 5 | 122382791 | G | A | 0.25 | 0.30 | 3.2E-04        | 0.78 |
| rs156031   | 5 | 131554089 | A | G | 0.24 | 0.19 | 1.9E-04        | 1.33 |
| rs244689   | 5 | 133450715 | A | G | 0.18 | 0.14 | 6.9E-05        | 1.39 |
| rs756699   | 5 | 133474474 | G | A | 0.18 | 0.14 | 2.4E-04        | 1.36 |
| rs6877546  | 5 | 133873011 | G | A | 0.21 | 0.17 | 4.2E-04        | 1.32 |
| rs1860059  | 5 | 133875078 | A | G | 0.18 | 0.14 | 1.4E-04        | 1.37 |
| rs2233299  | 5 | 150405660 | A | G | 0.31 | 0.26 | 2.1E-04        | 1.29 |
| rs1422673  | 5 | 150419181 | A | G | 0.26 | 0.19 | <b>6.2E-09</b> | 1.53 |
| rs2233287  | 5 | 150420290 | A | G | 0.14 | 0.09 | <b>4.6E-09</b> | 1.76 |
| rs4958881  | 5 | 150430429 | G | A | 0.18 | 0.11 | <b>3.2E-10</b> | 1.73 |
| rs3792785  | 5 | 150431843 | G | A | 0.16 | 0.10 | <b>3.6E-08</b> | 1.65 |
| rs3792783  | 5 | 150435925 | G | A | 0.22 | 0.16 | <b>1.7E-08</b> | 1.56 |
| rs13168551 | 5 | 150442831 | G | A | 0.49 | 0.42 | 6.0E-06        | 1.33 |
| rs2431697  | 5 | 159812556 | G | A | 0.37 | 0.43 | 1.4E-05        | 0.76 |
| rs1432910  | 5 | 168324135 | G | A | 0.41 | 0.47 | 3.0E-04        | 0.79 |
| rs1047631  | 6 | 15631080  | G | A | 0.12 | 0.16 | 2.5E-05        | 0.67 |
| rs1474605  | 6 | 15766191  | G | A | 0.17 | 0.22 | 5.4E-05        | 0.72 |
| rs1235162  | 6 | 29645203  | G | A | 0.29 | 0.11 | <b>1.8E-49</b> | 3.30 |
| rs2524005  | 6 | 30007656  | A | G | 0.41 | 0.19 | <b>3.5E-51</b> | 2.86 |
| rs3132685  | 6 | 30053928  | A | G | 0.31 | 0.12 | <b>1.0E-54</b> | 3.51 |
| rs8321     | 6 | 30140501  | C | A | 0.30 | 0.11 | <b>6.5E-57</b> | 3.67 |
| rs9261290  | 6 | 30146626  | G | A | 0.31 | 0.11 | <b>2.6E-58</b> | 3.71 |
| rs2523989  | 6 | 30186254  | A | G | 0.38 | 0.16 | <b>1.1E-57</b> | 3.26 |
| rs2523987  | 6 | 30187972  | C | A | 0.37 | 0.15 | <b>8.7E-61</b> | 3.46 |

|            |   |           |   |   |      |      |                |      |
|------------|---|-----------|---|---|------|------|----------------|------|
| rs2517598  | 6 | 30188253  | A | G | 0.38 | 0.17 | <b>1.4E-55</b> | 3.15 |
| rs3130380  | 6 | 30387109  | A | G | 0.32 | 0.11 | <b>1.8E-62</b> | 3.92 |
| rs3130350  | 6 | 30435818  | A | C | 0.32 | 0.11 | <b>3.4E-63</b> | 3.96 |
| rs3094054  | 6 | 30441484  | A | C | 0.32 | 0.12 | <b>1.9E-61</b> | 3.82 |
| rs3132610  | 6 | 30652380  | G | A | 0.34 | 0.13 | <b>2.8E-63</b> | 3.81 |
| rs886424   | 6 | 30889981  | A | G | 0.37 | 0.14 | <b>4.1E-69</b> | 4.03 |
| rs2844659  | 6 | 30932511  | A | G | 0.46 | 0.20 | <b>1.3E-68</b> | 3.56 |
| rs2844657  | 6 | 30937501  | G | A | 0.46 | 0.20 | <b>3.0E-69</b> | 3.57 |
| rs4678     | 6 | 31001920  | A | G | 0.45 | 0.20 | <b>4.6E-68</b> | 3.58 |
| rs3132580  | 6 | 31028103  | A | G | 0.38 | 0.14 | <b>1.9E-70</b> | 4.09 |
| rs3095089  | 6 | 31041773  | A | C | 0.45 | 0.18 | <b>1.8E-79</b> | 4.28 |
| rs886403   | 6 | 31065597  | G | A | 0.54 | 0.29 | <b>4.6E-60</b> | 3.13 |
| rs1634718  | 6 | 31080844  | G | A | 0.53 | 0.28 | <b>8.2E-61</b> | 3.15 |
| rs3130544  | 6 | 31166319  | A | C | 0.40 | 0.13 | <b>1.5E-90</b> | 5.64 |
| rs2233956  | 6 | 31189184  | G | A | 0.43 | 0.18 | <b>6.1E-68</b> | 3.82 |
| rs3130564  | 6 | 31209653  | A | G | 0.44 | 0.22 | <b>1.6E-56</b> | 3.25 |
| rs7750641  | 6 | 31237289  | A | G | 0.41 | 0.13 | <b>1.2E-92</b> | 6.25 |
| rs1265159  | 6 | 31248026  | A | G | 0.45 | 0.22 | <b>1.4E-57</b> | 3.22 |
| rs887464   | 6 | 31253899  | G | A | 0.29 | 0.54 | <b>2.5E-52</b> | 0.34 |
| rs3130473  | 6 | 31307187  | A | G | 0.48 | 0.25 | <b>1.5E-55</b> | 3.03 |
| rs2596560  | 6 | 31463297  | G | A | 0.49 | 0.25 | <b>3.1E-58</b> | 3.07 |
| rs3099844  | 6 | 31556955  | A | C | 0.39 | 0.13 | <b>4.7E-85</b> | 5.10 |
| rs2855812  | 6 | 31580699  | A | C | 0.49 | 0.27 | <b>4.2E-52</b> | 2.91 |
| rs2516400  | 6 | 31589084  | A | G | 0.58 | 0.33 | <b>8.4E-53</b> | 2.80 |
| rs2857595  | 6 | 31676448  | A | G | 0.43 | 0.20 | <b>1.0E-60</b> | 3.38 |
| rs3115663  | 6 | 31709822  | G | A | 0.44 | 0.19 | <b>2.4E-67</b> | 3.61 |
| rs9267522  | 6 | 31711749  | G | A | 0.44 | 0.19 | <b>3.8E-67</b> | 3.61 |
| rs3130618  | 6 | 31740113  | A | C | 0.44 | 0.19 | <b>2.0E-67</b> | 3.62 |
| rs3131379  | 6 | 31829012  | A | G | 0.37 | 0.12 | <b>9.7E-84</b> | 5.24 |
| rs558702   | 6 | 31978305  | A | G | 0.36 | 0.12 | <b>5.2E-82</b> | 5.13 |
| rs1270942  | 6 | 32026839  | G | A | 0.35 | 0.12 | <b>1.2E-79</b> | 4.99 |
| rs389884   | 6 | 32048876  | G | A | 0.35 | 0.12 | <b>1.8E-79</b> | 4.96 |
| rs204990   | 6 | 32269408  | A | C | 0.40 | 0.20 | <b>7.0E-49</b> | 2.95 |
| rs3131296  | 6 | 32280971  | A | G | 0.35 | 0.14 | <b>7.1E-61</b> | 3.78 |
| rs7775397  | 6 | 32369230  | C | A | 0.34 | 0.12 | <b>2.6E-75</b> | 4.72 |
| rs3129939  | 6 | 32444744  | G | A | 0.37 | 0.18 | <b>1.1E-49</b> | 3.10 |
| rs1980493  | 6 | 32471193  | G | A | 0.42 | 0.17 | <b>5.9E-70</b> | 3.79 |
| rs3129963  | 6 | 32488186  | G | A | 0.43 | 0.19 | <b>2.5E-64</b> | 3.49 |
| rs3135353  | 6 | 32500855  | A | G | 0.41 | 0.16 | <b>1.8E-72</b> | 4.01 |
| rs3129890  | 6 | 32522251  | G | A | 0.50 | 0.27 | <b>3.4E-51</b> | 2.81 |
| rs2187668  | 6 | 32713862  | A | G | 0.34 | 0.13 | <b>1.3E-67</b> | 4.19 |
| rs1794282  | 6 | 32774504  | A | G | 0.33 | 0.11 | <b>1.4E-73</b> | 4.68 |
| rs7762279  | 6 | 32863268  | G | A | 0.28 | 0.10 | <b>1.6E-58</b> | 4.00 |
| rs1026421  | 7 | 50291272  | G | A | 0.29 | 0.34 | 4.4E-04        | 0.79 |
| rs10267413 | 7 | 115115076 | G | A | 0.12 | 0.09 | 4.4E-04        | 1.42 |
| rs6466555  | 7 | 115149783 | G | A | 0.12 | 0.09 | 4.2E-04        | 1.42 |
| rs10245192 | 7 | 115161378 | G | A | 0.12 | 0.09 | 4.5E-04        | 1.41 |

|            |    |           |   |   |      |      |         |      |
|------------|----|-----------|---|---|------|------|---------|------|
| rs6946417  | 7  | 115162968 | G | A | 0.12 | 0.09 | 4.4E-04 | 1.41 |
| rs4731437  | 7  | 127699802 | A | G | 0.15 | 0.12 | 1.0E-04 | 1.41 |
| rs1466146  | 7  | 127702612 | A | G | 0.15 | 0.11 | 2.1E-05 | 1.46 |
| rs6979784  | 7  | 127703444 | A | G | 0.22 | 0.18 | 2.1E-04 | 1.33 |
| rs729302   | 7  | 128356196 | C | A | 0.27 | 0.33 | 2.3E-05 | 0.74 |
| rs4728142  | 7  | 128361203 | A | G | 0.49 | 0.44 | 3.6E-04 | 1.25 |
| rs10488631 | 7  | 128381419 | G | A | 0.16 | 0.11 | 4.0E-05 | 1.44 |
| rs661079   | 7  | 138289386 | A | G | 0.31 | 0.26 | 4.0E-04 | 1.28 |
| rs4725367  | 7  | 150156812 | G | A | 0.49 | 0.43 | 6.5E-05 | 1.29 |
| rs6956432  | 7  | 150170084 | G | A | 0.29 | 0.35 | 2.0E-04 | 0.78 |
| rs2969123  | 7  | 156401228 | A | G | 0.27 | 0.22 | 4.9E-05 | 1.33 |
| rs7791257  | 7  | 156415603 | G | A | 0.27 | 0.21 | 2.7E-05 | 1.35 |
| rs11989070 | 8  | 14352188  | C | A | 0.12 | 0.16 | 3.1E-05 | 0.67 |
| rs10109853 | 8  | 39982038  | G | A | 0.45 | 0.50 | 3.6E-04 | 0.80 |
| rs10958579 | 8  | 39986984  | A | G | 0.25 | 0.30 | 4.7E-04 | 0.78 |
| rs17661532 | 8  | 41710431  | A | G | 0.21 | 0.26 | 2.0E-04 | 0.75 |
| rs12679553 | 8  | 58428352  | G | A | 0.27 | 0.22 | 1.2E-04 | 1.31 |
| rs7813241  | 8  | 60063266  | G | A | 0.19 | 0.24 | 3.9E-04 | 0.76 |
| rs4737623  | 8  | 64060700  | G | A | 0.20 | 0.16 | 1.8E-04 | 1.34 |
| rs1031553  | 8  | 64069382  | A | G | 0.20 | 0.16 | 2.2E-04 | 1.34 |
| rs6990501  | 8  | 104359324 | G | A | 0.14 | 0.10 | 1.9E-04 | 1.41 |
| rs3915792  | 8  | 125757588 | A | G | 0.30 | 0.25 | 1.8E-04 | 1.29 |
| rs951920   | 8  | 140079282 | G | A | 0.38 | 0.33 | 1.1E-04 | 1.29 |
| rs2382267  | 9  | 11107514  | G | A | 0.11 | 0.08 | 3.9E-04 | 1.43 |
| rs10756426 | 9  | 12937238  | A | G | 0.12 | 0.09 | 3.0E-04 | 1.43 |
| rs10869950 | 9  | 79446820  | A | G | 0.12 | 0.16 | 3.8E-04 | 0.72 |
| rs1078815  | 9  | 86934630  | A | G | 0.49 | 0.44 | 4.6E-04 | 1.25 |
| rs10868257 | 9  | 86951727  | A | G | 0.49 | 0.43 | 3.8E-04 | 1.25 |
| rs620420   | 9  | 86968776  | G | A | 0.44 | 0.49 | 3.4E-04 | 0.80 |
| rs2274561  | 9  | 88562610  | G | A | 0.18 | 0.14 | 2.2E-04 | 1.35 |
| rs4978738  | 9  | 110585509 | A | G | 0.37 | 0.42 | 4.8E-04 | 0.80 |
| rs3750340  | 9  | 130812210 | A | C | 0.19 | 0.15 | 3.2E-04 | 1.34 |
| rs224149   | 10 | 64157079  | A | G | 0.52 | 0.46 | 2.7E-04 | 1.26 |
| rs10761660 | 10 | 64186312  | G | A | 0.35 | 0.41 | 2.9E-04 | 0.79 |
| rs10509279 | 10 | 68494799  | A | G | 0.05 | 0.08 | 4.7E-04 | 0.62 |
| rs11190140 | 10 | 101281583 | A | G | 0.52 | 0.47 | 4.4E-04 | 1.25 |
| rs10787677 | 10 | 118228407 | C | A | 0.10 | 0.07 | 3.7E-05 | 1.58 |
| rs10787704 | 10 | 118268518 | G | A | 0.10 | 0.07 | 3.3E-05 | 1.59 |
| rs7947162  | 11 | 98606530  | G | A | 0.39 | 0.33 | 3.5E-04 | 1.26 |
| rs7939722  | 11 | 127771448 | C | A | 0.49 | 0.44 | 4.7E-04 | 1.25 |
| rs7934171  | 11 | 127775054 | A | C | 0.49 | 0.43 | 2.0E-04 | 1.26 |
| rs752450   | 11 | 128772691 | A | G | 0.18 | 0.14 | 2.7E-04 | 1.35 |
| rs1860394  | 12 | 3309312   | A | C | 0.41 | 0.36 | 4.4E-04 | 1.26 |
| rs10848856 | 12 | 3321534   | G | A | 0.41 | 0.36 | 2.7E-04 | 1.27 |
| rs10849271 | 12 | 5425381   | A | G | 0.09 | 0.06 | 8.9E-05 | 1.55 |
| rs1427271  | 12 | 39018661  | A | G | 0.18 | 0.14 | 1.1E-04 | 1.38 |
| rs1434239  | 12 | 93813862  | G | A | 0.23 | 0.18 | 4.3E-05 | 1.36 |

|            |    |           |   |   |      |      |         |      |
|------------|----|-----------|---|---|------|------|---------|------|
| rs6538566  | 12 | 93820689  | A | C | 0.25 | 0.20 | 1.2E-04 | 1.33 |
| rs10746129 | 12 | 107615218 | G | A | 0.41 | 0.47 | 1.6E-04 | 0.79 |
| rs1946295  | 12 | 113286744 | A | G | 0.23 | 0.27 | 4.4E-04 | 0.77 |
| rs780876   | 12 | 114672478 | A | G | 0.34 | 0.28 | 2.0E-05 | 1.33 |
| rs9515742  | 13 | 89883355  | A | G | 0.38 | 0.33 | 1.9E-04 | 1.28 |
| rs2210054  | 14 | 33091890  | G | A | 0.46 | 0.41 | 3.7E-04 | 1.26 |
| rs7146515  | 14 | 43109124  | A | G | 0.15 | 0.11 | 2.9E-05 | 1.45 |
| rs2038532  | 14 | 43248804  | A | G | 0.14 | 0.10 | 1.0E-04 | 1.44 |
| rs9323081  | 14 | 43263007  | A | G | 0.14 | 0.10 | 1.3E-04 | 1.43 |
| rs17309078 | 14 | 43277325  | A | G | 0.14 | 0.10 | 2.8E-04 | 1.41 |
| rs7148865  | 14 | 97858159  | A | C | 0.21 | 0.17 | 1.4E-04 | 1.34 |
| rs7152787  | 14 | 97885039  | G | A | 0.47 | 0.41 | 4.8E-05 | 1.29 |
| rs8008676  | 14 | 102304315 | A | G | 0.24 | 0.20 | 4.1E-04 | 1.30 |
| rs7143963  | 14 | 102374178 | A | G | 0.21 | 0.17 | 1.7E-04 | 1.34 |
| rs1131877  | 14 | 102411802 | G | A | 0.27 | 0.22 | 2.1E-04 | 1.30 |
| rs4906269  | 14 | 102431770 | C | A | 0.21 | 0.16 | 2.2E-05 | 1.39 |
| rs10133111 | 14 | 102447074 | A | G | 0.20 | 0.16 | 1.7E-04 | 1.34 |
| rs7169523  | 15 | 29250670  | A | G | 0.28 | 0.22 | 1.9E-06 | 1.40 |
| rs11636101 | 15 | 30061449  | A | C | 0.35 | 0.30 | 3.0E-04 | 1.27 |
| rs2063722  | 15 | 30083665  | C | A | 0.45 | 0.39 | 1.2E-04 | 1.28 |
| rs16954263 | 15 | 32688722  | A | G | 0.27 | 0.32 | 3.5E-04 | 0.78 |
| rs10518693 | 15 | 38487314  | A | G | 0.36 | 0.41 | 1.9E-04 | 0.79 |
| rs2034650  | 15 | 38504594  | G | A | 0.53 | 0.47 | 3.2E-04 | 1.25 |
| rs2290430  | 15 | 58579246  | C | A | 0.07 | 0.10 | 4.3E-04 | 0.65 |
| rs10519096 | 15 | 59077236  | A | G | 0.18 | 0.14 | 9.2E-05 | 1.38 |
| rs10519097 | 15 | 59077480  | A | G | 0.19 | 0.14 | 4.7E-05 | 1.39 |
| rs4776292  | 15 | 64300867  | A | G | 0.27 | 0.32 | 1.3E-04 | 0.77 |
| rs3812945  | 15 | 73076775  | G | A | 0.43 | 0.49 | 4.6E-04 | 0.80 |
| rs12148488 | 15 | 73169595  | A | C | 0.54 | 0.48 | 3.8E-04 | 1.25 |
| rs4420499  | 15 | 75102029  | A | C | 0.18 | 0.14 | 3.6E-04 | 1.35 |
| rs4985147  | 16 | 15076261  | A | G | 0.45 | 0.40 | 2.4E-04 | 1.26 |
| rs2271047  | 16 | 69376260  | G | A | 0.48 | 0.43 | 4.8E-04 | 1.24 |
| rs6540278  | 16 | 84178403  | G | A | 0.10 | 0.14 | 2.9E-04 | 0.69 |
| rs9925302  | 16 | 85223804  | A | G | 0.15 | 0.11 | 3.6E-04 | 1.37 |
| rs1877031  | 17 | 35067606  | G | A | 0.28 | 0.34 | 3.0E-04 | 0.78 |
| rs2271308  | 17 | 35071008  | A | G | 0.23 | 0.28 | 2.9E-04 | 0.77 |
| rs931992   | 17 | 35074961  | C | A | 0.28 | 0.33 | 4.9E-04 | 0.79 |
| rs907092   | 17 | 35175785  | A | G | 0.53 | 0.48 | 4.4E-04 | 1.25 |
| rs9303277  | 17 | 35229995  | G | A | 0.42 | 0.48 | 1.5E-05 | 0.76 |
| rs11557467 | 17 | 35282160  | C | A | 0.42 | 0.49 | 6.0E-05 | 0.78 |
| rs8067378  | 17 | 35304874  | A | G | 0.42 | 0.48 | 2.7E-05 | 0.77 |
| rs2290400  | 17 | 35319766  | A | G | 0.43 | 0.49 | 3.8E-05 | 0.77 |
| rs7216389  | 17 | 35323475  | A | G | 0.43 | 0.49 | 1.2E-04 | 0.79 |
| rs7502006  | 17 | 68414311  | G | A | 0.53 | 0.47 | 4.5E-04 | 1.24 |
| rs6501581  | 17 | 68427194  | G | A | 0.38 | 0.44 | 3.1E-04 | 0.79 |
| rs3745004  | 18 | 41914398  | A | C | 0.08 | 0.12 | 7.2E-05 | 0.65 |
| rs323092   | 18 | 47545959  | G | A | 0.17 | 0.14 | 3.5E-04 | 1.35 |

|            |    |           |   |   |      |      |         |      |
|------------|----|-----------|---|---|------|------|---------|------|
| rs1619323  | 18 | 48215948  | G | A | 0.24 | 0.20 | 3.9E-04 | 1.30 |
| rs1790588  | 18 | 65686164  | G | A | 0.54 | 0.48 | 4.9E-04 | 1.24 |
| rs9956473  | 18 | 73065628  | G | A | 0.18 | 0.14 | 2.1E-04 | 1.36 |
| rs12456229 | 18 | 73247400  | A | C | 0.27 | 0.33 | 5.5E-05 | 0.75 |
| rs6565965  | 18 | 73256562  | G | A | 0.40 | 0.46 | 1.2E-04 | 0.78 |
| rs8099113  | 18 | 75367142  | A | G | 0.10 | 0.07 | 4.2E-04 | 1.46 |
| rs11668429 | 19 | 10477303  | C | A | 0.31 | 0.36 | 4.0E-04 | 0.79 |
| rs8111895  | 19 | 22865045  | A | G | 0.16 | 0.12 | 2.1E-04 | 1.38 |
| rs4801321  | 19 | 61662562  | A | G | 0.10 | 0.15 | 1.4E-04 | 0.69 |
| rs3760848  | 19 | 61673194  | G | A | 0.12 | 0.16 | 4.3E-04 | 0.72 |
| rs1548866  | 19 | 61837246  | G | A | 0.36 | 0.41 | 4.8E-04 | 0.80 |
| rs4813669  | 20 | 4040860   | G | A | 0.28 | 0.33 | 1.1E-04 | 0.77 |
| rs2422979  | 20 | 4712682   | A | G | 0.39 | 0.45 | 1.6E-04 | 0.79 |
| rs11698138 | 20 | 17539579  | G | A | 0.13 | 0.09 | 1.6E-05 | 1.50 |
| rs6028806  | 20 | 38094753  | A | G | 0.18 | 0.24 | 4.5E-05 | 0.72 |
| rs6066968  | 20 | 47160748  | G | A | 0.36 | 0.41 | 3.5E-04 | 0.80 |
| rs572159   | 22 | 26060109  | G | A | 0.37 | 0.43 | 9.1E-05 | 0.78 |
| rs470049   | 22 | 33089241  | G | A | 0.34 | 0.28 | 4.8E-05 | 1.32 |
| rs5963897  | 23 | 40677339  | A | G | 0.22 | 0.27 | 4.4E-04 | 0.75 |
| rs5936708  | 23 | 68760973  | G | A | 0.21 | 0.26 | 3.1E-04 | 0.75 |
| rs1327347  | 23 | 68773178  | G | A | 0.34 | 0.39 | 3.6E-04 | 0.78 |
| rs5921691  | 23 | 100049724 | C | A | 0.39 | 0.46 | 1.1E-05 | 0.74 |
| rs1204413  | 23 | 100075191 | A | G | 0.22 | 0.27 | 2.3E-04 | 0.74 |
| rs845188   | 23 | 140204554 | G | A | 0.39 | 0.33 | 1.4E-04 | 1.30 |
| rs497220   | 23 | 149426932 | G | A | 0.09 | 0.13 | 1.9E-04 | 0.65 |

- For the MHC region on chromosome 6 only the 50 SNPs with the best p-values are included.
- Base-pair position based on NCBI build 36, HG18.
- Minor allele (Allele A) and alternative allele (Allele B).
- MAF are the Case and control minor allele frequencies.
- Combined p value adjusting for ancestry and gender covariates (see methods).
- Odds ratio (OR) and 95% confidence intervals [lower (L96); upper (U95)] and are based on :
- Discovery p value adjusting for ancestry and gender covariates (see methods).
- Replication set p values adjusting for ancestry and gender covariates (see methods).

| L95 <sup>f</sup> | U95 <sup>f</sup> | DISC p-value <sup>g</sup> | Rep p-value <sup>h</sup> | CMH P-value |
|------------------|------------------|---------------------------|--------------------------|-------------|
| 1.20             | 1.90             | 1.4E-02                   | 9.6E-03                  | 3.2E-04     |
| 1.15             | 1.51             | 3.0E-05                   | 4.8E-01                  | 5.9E-05     |
| 1.14             | 1.51             | 3.7E-03                   | 1.4E-02                  | 2.2E-04     |
| 1.15             | 1.47             | 1.7E-05                   | 2.1E-01                  | 3.9E-05     |
| 0.64             | 0.88             | 1.1E-02                   | 1.2E-02                  | 7.1E-04     |
| 1.12             | 1.43             | 8.3E-03                   | 1.4E-02                  | 1.5E-04     |
| 0.64             | 0.88             | 3.3E-03                   | 5.8E-02                  | 4.8E-04     |
| 1.16             | 1.53             | 2.3E-03                   | 1.4E-02                  | 8.9E-05     |
| 1.12             | 1.47             | 1.7E-03                   | 6.3E-02                  | 2.8E-04     |
| 1.12             | 1.47             | 1.7E-03                   | 7.1E-02                  | 3.3E-04     |
| 1.12             | 1.47             | 1.2E-03                   | 7.2E-02                  | 2.2E-04     |
| 1.44             | 2.02             | 6.5E-09                   | 6.2E-03                  | 3.7E-10     |
| 1.13             | 1.48             | 1.1E-03                   | 6.6E-02                  | 2.0E-04     |
| 1.11             | 1.47             | 1.5E-03                   | 1.0E-01                  | 4.2E-04     |
| 1.17             | 1.67             | 1.8E-02                   | 4.3E-03                  | 1.6E-04     |
| 0.57             | 0.84             | 9.9E-02                   | 1.9E-04                  | 1.2E-04     |
| 0.61             | 0.83             | 2.1E-03                   | 1.0E-03                  | 5.4E-06     |
| 1.13             | 1.54             | 1.0E-02                   | 1.7E-02                  | 5.0E-04     |
| 1.12             | 1.47             | 5.0E-03                   | 1.2E-02                  | 1.6E-04     |
| 1.15             | 1.58             | 6.9E-03                   | 1.2E-02                  | 1.8E-04     |
| 0.67             | 0.89             | 1.2E-02                   | 7.7E-03                  | 4.7E-04     |
| 1.12             | 1.50             | 7.2E-03                   | 2.9E-02                  | 3.7E-04     |
| 1.11             | 1.45             | 2.6E-04                   | 2.3E-01                  | 3.9E-04     |
| 1.11             | 1.44             | 1.9E-04                   | 2.8E-01                  | 3.2E-04     |
| 1.12             | 1.48             | 9.1E-03                   | 1.6E-02                  | 2.9E-04     |
| 1.17             | 1.50             | 4.6E-02                   | 6.7E-06                  | 8.1E-06     |
| 1.19             | 1.52             | 1.3E-02                   | 1.4E-05                  | 2.2E-06     |
| 1.10             | 1.41             | 4.6E-03                   | 4.7E-02                  | 3.4E-04     |
| 1.20             | 1.77             | 1.7E-02                   | 1.9E-03                  | 1.3E-04     |
| 1.12             | 1.44             | 1.7E-02                   | 2.1E-03                  | 8.3E-05     |
| 1.11             | 1.41             | 5.1E-02                   | 1.8E-03                  | 2.6E-04     |
| 1.25             | 1.82             | 4.4E-02                   | 6.1E-05                  | 2.8E-05     |
| 0.71             | 0.91             | 3.3E-03                   | 8.0E-02                  | 4.7E-04     |
| 1.11             | 1.44             | 1.3E-02                   | 6.4E-03                  | 5.2E-04     |
| 0.70             | 0.89             | 2.5E-03                   | 2.8E-02                  | 1.8E-04     |
| 1.10             | 1.41             | 1.8E-04                   | 4.5E-01                  | 4.1E-04     |
| 1.12             | 1.43             | 2.2E-04                   | 2.3E-01                  | 1.6E-04     |
| 1.12             | 1.49             | 6.0E-05                   | 5.3E-01                  | 3.9E-04     |
| 1.12             | 1.42             | 2.2E-04                   | 2.4E-01                  | 1.6E-04     |
| 1.12             | 1.45             | 2.4E-04                   | 2.3E-01                  | 2.1E-04     |
| 0.62             | 0.86             | 1.1E-02                   | 2.6E-03                  | 2.0E-04     |

|      |      |         |         |         |
|------|------|---------|---------|---------|
| 1.13 | 1.45 | 1.2E-05 | 4.8E-01 | 7.0E-05 |
| 1.11 | 1.42 | 4.7E-05 | 5.3E-01 | 2.1E-04 |
| 0.69 | 0.88 | 2.0E-03 | 2.2E-02 | 1.0E-04 |
| 1.13 | 1.47 | 7.5E-03 | 3.5E-03 | 1.4E-04 |
| 0.62 | 0.87 | 1.6E-02 | 8.8E-03 | 4.7E-04 |
| 1.12 | 1.44 | 1.7E-02 | 1.7E-03 | 2.2E-04 |
| 1.20 | 1.75 | 3.3E-03 | 2.0E-02 | 7.4E-05 |
| 0.64 | 0.88 | 1.4E-03 | 7.1E-02 | 2.4E-04 |
| 1.15 | 1.47 | 1.3E-05 | 2.9E-01 | 4.0E-05 |
| 1.19 | 1.53 | 1.7E-06 | 1.6E-01 | 3.4E-06 |
| 1.14 | 1.47 | 2.0E-04 | 6.5E-02 | 6.0E-05 |
| 1.23 | 1.82 | 1.8E-06 | 8.7E-01 | 7.9E-05 |
| 0.58 | 0.85 | 1.3E-02 | 6.7E-03 | 2.4E-04 |
| 0.70 | 0.91 | 3.0E-02 | 3.1E-03 | 6.9E-04 |
| 0.68 | 0.89 | 8.0E-03 | 1.4E-02 | 3.0E-04 |
| 1.19 | 1.61 | 3.1E-01 | 2.7E-07 | 1.4E-05 |
| 0.65 | 0.88 | 9.4E-03 | 2.3E-02 | 3.4E-04 |
| 0.45 | 0.77 | 3.0E-02 | 7.7E-04 | 1.0E-04 |
| 1.10 | 1.41 | 5.5E-03 | 6.1E-02 | 5.8E-04 |
| 0.59 | 0.86 | 7.5E-03 | 2.4E-02 | 5.4E-04 |
| 0.70 | 0.90 | 1.4E-03 | 8.8E-02 | 3.5E-04 |
| 0.51 | 0.83 | 1.5E-02 | 8.8E-03 | 4.5E-04 |
| 0.57 | 0.83 | 4.0E-05 | 3.2E-01 | 9.3E-05 |
| 0.68 | 0.89 | 3.1E-03 | 6.2E-02 | 2.5E-04 |
| 1.14 | 1.54 | 1.6E-03 | 4.8E-02 | 1.8E-04 |
| 1.18 | 1.64 | 1.8E-03 | 1.2E-02 | 6.6E-05 |
| 1.15 | 1.60 | 2.8E-02 | 1.7E-03 | 2.1E-04 |
| 1.13 | 1.54 | 2.1E-03 | 1.0E-01 | 5.2E-04 |
| 1.17 | 1.61 | 1.3E-03 | 4.3E-02 | 1.6E-04 |
| 1.13 | 1.48 | 8.6E-02 | 2.1E-04 | 2.8E-04 |
| 1.32 | 1.76 | 1.7E-05 | 8.1E-05 | 1.8E-09 |
| 1.46 | 2.12 | 4.4E-06 | 3.9E-04 | 3.5E-09 |
| 1.46 | 2.06 | 1.2E-05 | 7.7E-06 | 2.6E-10 |
| 1.38 | 1.97 | 2.1E-05 | 1.0E-03 | 3.1E-08 |
| 1.33 | 1.81 | 3.7E-04 | 7.0E-06 | 1.4E-08 |
| 1.18 | 1.50 | 5.1E-03 | 1.5E-04 | 6.1E-06 |
| 0.67 | 0.86 | 4.0E-04 | 1.2E-02 | 1.4E-05 |
| 0.70 | 0.90 | 1.1E-04 | 3.5E-01 | 2.8E-04 |
| 0.56 | 0.81 | 1.6E-03 | 5.1E-03 | 2.0E-05 |
| 0.61 | 0.84 | 2.8E-03 | 6.8E-03 | 4.4E-05 |
| 2.82 | 3.87 | 1.6E-27 | 1.4E-23 | 4.5E-57 |
| 2.49 | 3.27 | 1.1E-27 | 2.4E-25 | 4.3E-59 |
| 2.99 | 4.11 | 1.4E-30 | 1.3E-25 | 1.5E-62 |
| 3.13 | 4.31 | 7.0E-33 | 1.5E-25 | 2.0E-66 |
| 3.17 | 4.36 | 2.0E-32 | 1.7E-27 | 8.3E-68 |
| 2.82 | 3.77 | 5.9E-33 | 1.1E-26 | 4.6E-67 |
| 2.98 | 4.01 | 4.1E-35 | 9.2E-28 | 3.4E-71 |



|      |      |         |         |          |
|------|------|---------|---------|----------|
| 2.73 | 3.63 | 2.3E-31 | 2.6E-26 | 2.5E-64  |
| 3.34 | 4.61 | 8.6E-36 | 2.2E-28 | 3.7E-73  |
| 3.37 | 4.65 | 7.2E-36 | 5.4E-29 | 1.9E-74  |
| 3.26 | 4.48 | 1.7E-35 | 1.2E-27 | 3.0E-71  |
| 3.26 | 4.46 | 2.1E-37 | 1.3E-27 | 4.2E-73  |
| 3.45 | 4.71 | 7.0E-40 | 9.7E-31 | 2.2E-81  |
| 3.09 | 4.11 | 2.3E-38 | 9.3E-32 | 1.5E-81  |
| 3.10 | 4.11 | 8.6E-40 | 5.2E-31 | 1.8E-82  |
| 3.10 | 4.13 | 1.0E-39 | 6.6E-30 | 9.3E-81  |
| 3.50 | 4.78 | 6.8E-40 | 7.2E-32 | 4.2E-82  |
| 3.68 | 4.98 | 8.9E-44 | 7.1E-37 | 1.2E-96  |
| 2.73 | 3.59 | 8.9E-30 | 2.1E-32 | 7.8E-67  |
| 2.75 | 3.62 | 1.9E-31 | 1.8E-31 | 3.0E-68  |
| 4.77 | 6.67 | 8.0E-54 | 3.3E-38 | 2.6E-110 |
| 3.28 | 4.44 | 2.6E-41 | 5.6E-28 | 1.2E-76  |
| 2.81 | 3.77 | 8.0E-38 | 2.0E-20 | 9.8E-60  |
| 4.89 | 6.85 | 9.6E-56 | 2.4E-38 | 1.7E-114 |
| 2.79 | 3.72 | 6.4E-32 | 5.2E-27 | 9.3E-63  |
| 0.30 | 0.39 | 4.3E-32 | 4.6E-22 | 7.1E-58  |
| 2.64 | 3.48 | 2.3E-32 | 7.6E-25 | 2.2E-61  |
| 2.68 | 3.51 | 2.6E-38 | 2.6E-21 | 2.3E-65  |
| 4.33 | 6.00 | 8.0E-53 | 7.5E-34 | 7.2E-104 |
| 2.53 | 3.33 | 4.1E-31 | 4.0E-22 | 2.8E-55  |
| 2.45 | 3.19 | 3.9E-30 | 3.3E-24 | 6.7E-59  |
| 2.93 | 3.91 | 1.2E-40 | 7.8E-22 | 1.1E-66  |
| 3.13 | 4.18 | 9.2E-41 | 1.6E-27 | 4.5E-78  |
| 3.12 | 4.17 | 1.8E-40 | 1.4E-27 | 1.1E-77  |
| 3.13 | 4.18 | 8.3E-41 | 1.6E-27 | 3.2E-78  |
| 4.43 | 6.19 | 2.1E-49 | 6.3E-36 | 4.2E-100 |
| 4.34 | 6.06 | 3.0E-48 | 1.5E-35 | 7.2E-97  |
| 4.22 | 5.89 | 1.5E-46 | 7.5E-35 | 4.3E-93  |
| 4.20 | 5.86 | 3.9E-47 | 4.2E-34 | 1.8E-93  |
| 2.56 | 3.41 | 2.7E-28 | 4.9E-22 | 3.2E-52  |
| 3.22 | 4.42 | 7.3E-34 | 2.0E-28 | 3.9E-68  |
| 4.00 | 5.58 | 7.6E-44 | 3.1E-33 | 3.0E-87  |
| 2.67 | 3.60 | 2.6E-28 | 7.0E-23 | 6.5E-52  |
| 3.27 | 4.39 | 8.7E-39 | 1.2E-32 | 2.1E-83  |
| 3.02 | 4.04 | 6.6E-35 | 8.9E-31 | 3.9E-73  |
| 3.45 | 4.66 | 2.5E-40 | 1.3E-33 | 7.1E-86  |
| 2.45 | 3.21 | 1.0E-27 | 1.6E-24 | 8.1E-56  |
| 3.57 | 4.93 | 8.0E-42 | 2.7E-27 | 4.9E-76  |
| 3.96 | 5.53 | 2.6E-43 | 7.6E-32 | 1.2E-83  |
| 3.38 | 4.74 | 8.4E-32 | 2.9E-28 | 1.4E-64  |
| 0.69 | 0.90 | 4.6E-03 | 4.7E-02 | 3.5E-04  |
| 1.17 | 1.72 | 1.4E-02 | 1.0E-02 | 3.7E-04  |
| 1.17 | 1.72 | 9.1E-03 | 1.6E-02 | 3.7E-04  |
| 1.17 | 1.72 | 8.8E-03 | 1.7E-02 | 3.8E-04  |

|      |      |         |         |         |
|------|------|---------|---------|---------|
| 1.17 | 1.72 | 9.3E-03 | 1.6E-02 | 3.9E-04 |
| 1.18 | 1.67 | 6.3E-03 | 8.9E-03 | 1.1E-04 |
| 1.23 | 1.74 | 3.1E-03 | 2.9E-03 | 2.0E-05 |
| 1.14 | 1.54 | 5.5E-03 | 2.4E-02 | 2.4E-04 |
| 0.65 | 0.85 | 1.2E-03 | 5.2E-03 | 2.4E-05 |
| 1.11 | 1.41 | 2.3E-03 | 5.1E-02 | 4.3E-04 |
| 1.21 | 1.71 | 6.3E-06 | 3.3E-01 | 3.9E-05 |
| 1.12 | 1.46 | 6.9E-05 | 4.2E-01 | 5.8E-04 |
| 1.14 | 1.46 | 3.6E-02 | 1.0E-04 | 7.8E-05 |
| 0.68 | 0.89 | 1.2E-01 | 4.4E-05 | 1.6E-04 |
| 1.16 | 1.53 | 6.9E-04 | 3.0E-02 | 3.9E-05 |
| 1.17 | 1.55 | 7.6E-04 | 1.4E-02 | 2.2E-05 |
| 0.56 | 0.81 | 3.4E-04 | 2.6E-02 | 3.6E-05 |
| 0.71 | 0.90 | 6.4E-03 | 2.4E-02 | 3.7E-04 |
| 0.68 | 0.90 | 1.0E-01 | 3.8E-04 | 3.1E-04 |
| 0.65 | 0.87 | 3.7E-03 | 3.0E-02 | 2.4E-04 |
| 1.14 | 1.51 | 2.2E-03 | 2.1E-02 | 1.4E-04 |
| 0.65 | 0.88 | 1.3E-03 | 1.4E-01 | 5.5E-04 |
| 1.15 | 1.57 | 1.2E-01 | 1.3E-04 | 1.4E-04 |
| 1.15 | 1.56 | 1.5E-01 | 1.1E-04 | 1.8E-04 |
| 1.18 | 1.69 | 2.7E-02 | 1.5E-03 | 1.8E-04 |
| 1.13 | 1.48 | 5.1E-02 | 5.7E-04 | 2.0E-04 |
| 1.13 | 1.46 | 1.8E-04 | 1.5E-01 | 1.2E-04 |
| 1.18 | 1.75 | 1.4E-03 | 1.3E-01 | 3.3E-04 |
| 1.18 | 1.73 | 8.0E-02 | 4.8E-04 | 2.7E-04 |
| 0.59 | 0.86 | 4.4E-03 | 3.9E-02 | 3.8E-04 |
| 1.10 | 1.41 | 4.4E-04 | 1.8E-01 | 7.0E-04 |
| 1.11 | 1.42 | 4.2E-04 | 1.6E-01 | 5.8E-04 |
| 0.70 | 0.90 | 5.0E-03 | 1.8E-02 | 4.4E-04 |
| 1.15 | 1.59 | 7.1E-03 | 2.1E-02 | 1.7E-04 |
| 0.70 | 0.91 | 5.0E-03 | 4.9E-02 | 7.9E-04 |
| 1.14 | 1.58 | 1.7E-03 | 5.5E-02 | 3.0E-04 |
| 1.11 | 1.42 | 1.6E-01 | 4.1E-05 | 2.8E-04 |
| 0.70 | 0.90 | 2.5E-02 | 1.8E-03 | 2.0E-04 |
| 0.48 | 0.81 | 1.6E-02 | 8.9E-03 | 5.0E-04 |
| 1.10 | 1.41 | 7.9E-04 | 1.9E-01 | 4.6E-04 |
| 1.27 | 1.96 | 2.8E-04 | 2.3E-02 | 5.5E-05 |
| 1.28 | 1.97 | 3.8E-04 | 1.6E-02 | 5.0E-05 |
| 1.11 | 1.43 | 2.5E-02 | 4.0E-03 | 2.9E-04 |
| 1.10 | 1.41 | 3.7E-02 | 2.2E-03 | 3.8E-04 |
| 1.12 | 1.43 | 3.5E-02 | 7.1E-04 | 1.9E-04 |
| 1.15 | 1.58 | 2.9E-02 | 1.6E-03 | 2.8E-04 |
| 1.11 | 1.43 | 1.5E-02 | 8.4E-03 | 5.5E-04 |
| 1.12 | 1.44 | 4.4E-03 | 2.8E-02 | 3.7E-04 |
| 1.25 | 1.93 | 9.2E-04 | 3.7E-02 | 1.1E-04 |
| 1.17 | 1.62 | 1.8E-03 | 2.1E-02 | 8.7E-05 |
| 1.18 | 1.58 | 1.5E-03 | 9.7E-03 | 4.2E-05 |

|      |      |         |         |         |
|------|------|---------|---------|---------|
| 1.15 | 1.53 | 1.3E-03 | 3.0E-02 | 9.6E-05 |
| 0.70 | 0.89 | 2.0E-03 | 3.3E-02 | 1.5E-04 |
| 0.67 | 0.89 | 8.1E-04 | 1.7E-01 | 5.2E-04 |
| 1.17 | 1.52 | 1.8E-03 | 3.4E-03 | 2.4E-05 |
| 1.12 | 1.45 | 2.2E-03 | 3.4E-02 | 2.5E-04 |
| 1.11 | 1.42 | 1.7E-04 | 3.1E-01 | 4.2E-04 |
| 1.22 | 1.73 | 3.4E-03 | 2.1E-03 | 1.4E-05 |
| 1.20 | 1.74 | 6.6E-04 | 4.8E-02 | 6.9E-05 |
| 1.19 | 1.73 | 8.5E-04 | 5.0E-02 | 9.5E-05 |
| 1.17 | 1.69 | 1.9E-03 | 5.2E-02 | 1.8E-04 |
| 1.15 | 1.56 | 2.3E-03 | 2.4E-02 | 1.6E-04 |
| 1.14 | 1.46 | 5.3E-04 | 3.0E-02 | 4.9E-05 |
| 1.13 | 1.51 | 2.9E-04 | 3.1E-01 | 4.4E-04 |
| 1.15 | 1.56 | 3.6E-04 | 1.4E-01 | 1.1E-04 |
| 1.13 | 1.49 | 9.8E-04 | 8.7E-02 | 1.7E-04 |
| 1.19 | 1.61 | 1.3E-04 | 5.6E-02 | 1.3E-05 |
| 1.15 | 1.56 | 2.4E-04 | 1.6E-01 | 1.2E-04 |
| 1.22 | 1.60 | 7.5E-04 | 5.9E-04 | 1.5E-06 |
| 1.12 | 1.44 | 7.6E-03 | 2.1E-02 | 2.6E-04 |
| 1.13 | 1.45 | 1.1E-03 | 5.8E-02 | 1.3E-04 |
| 0.68 | 0.89 | 2.4E-03 | 6.7E-02 | 3.8E-04 |
| 0.70 | 0.89 | 1.9E-02 | 2.7E-03 | 1.3E-04 |
| 1.11 | 1.40 | 2.2E-02 | 3.4E-03 | 1.9E-04 |
| 0.52 | 0.83 | 2.6E-03 | 6.8E-02 | 3.7E-04 |
| 1.17 | 1.62 | 3.4E-03 | 1.8E-02 | 1.2E-04 |
| 1.19 | 1.63 | 2.5E-03 | 1.3E-02 | 6.6E-05 |
| 0.67 | 0.88 | 2.5E-03 | 1.6E-02 | 1.2E-04 |
| 0.71 | 0.91 | 1.4E-03 | 9.9E-02 | 3.2E-04 |
| 1.11 | 1.41 | 4.2E-04 | 2.2E-01 | 3.0E-04 |
| 1.14 | 1.59 | 3.0E-03 | 3.4E-02 | 3.5E-04 |
| 1.12 | 1.43 | 2.2E-03 | 4.9E-02 | 2.8E-04 |
| 1.10 | 1.41 | 1.6E-01 | 8.5E-05 | 3.7E-04 |
| 0.57 | 0.84 | 1.2E-02 | 1.3E-02 | 4.0E-04 |
| 1.15 | 1.64 | 2.0E-01 | 5.8E-05 | 3.0E-04 |
| 0.68 | 0.89 | 6.4E-03 | 2.1E-02 | 2.9E-04 |
| 0.66 | 0.89 | 2.9E-03 | 5.5E-02 | 3.2E-04 |
| 0.69 | 0.90 | 9.9E-03 | 2.2E-02 | 4.6E-04 |
| 1.10 | 1.41 | 1.3E-01 | 4.1E-04 | 5.4E-04 |
| 0.67 | 0.86 | 3.4E-02 | 4.1E-05 | 1.2E-05 |
| 0.69 | 0.88 | 8.5E-02 | 5.0E-05 | 5.4E-05 |
| 0.68 | 0.87 | 4.7E-02 | 6.1E-05 | 2.4E-05 |
| 0.68 | 0.87 | 5.0E-02 | 9.2E-05 | 3.7E-05 |
| 0.69 | 0.89 | 1.2E-01 | 6.8E-05 | 1.3E-04 |
| 1.10 | 1.40 | 2.6E-04 | 3.8E-01 | 5.3E-04 |
| 0.70 | 0.90 | 3.2E-04 | 2.2E-01 | 4.0E-04 |
| 0.52 | 0.80 | 3.2E-05 | 2.1E-01 | 4.8E-05 |
| 1.15 | 1.59 | 8.4E-02 | 4.0E-04 | 3.5E-04 |

|      |      |         |         |         |
|------|------|---------|---------|---------|
| 1.13 | 1.50 | 1.5E-04 | 2.7E-01 | 3.4E-04 |
| 1.10 | 1.40 | 7.1E-04 | 2.0E-01 | 4.0E-04 |
| 1.16 | 1.60 | 3.7E-03 | 2.6E-02 | 2.0E-04 |
| 0.66 | 0.87 | 1.8E-03 | 1.8E-02 | 4.3E-05 |
| 0.69 | 0.89 | 2.6E-03 | 2.7E-02 | 8.5E-05 |
| 1.18 | 1.81 | 9.5E-02 | 1.0E-03 | 3.6E-04 |
| 0.69 | 0.90 | 2.3E-02 | 6.7E-03 | 4.9E-04 |
| 1.16 | 1.64 | 5.3E-03 | 2.0E-02 | 2.2E-04 |
| 0.57 | 0.83 | 4.0E-03 | 8.6E-03 | 8.6E-05 |
| 0.60 | 0.86 | 2.5E-02 | 3.2E-03 | 2.5E-04 |
| 0.70 | 0.91 | 3.2E-05 | 7.6E-01 | 5.4E-04 |
| 0.67 | 0.88 | 3.5E-02 | 6.9E-04 | 1.4E-04 |
| 0.69 | 0.89 | 8.5E-04 | 4.9E-02 | 1.7E-04 |
| 1.25 | 1.81 | 7.9E-05 | 7.7E-02 | 1.1E-05 |
| 0.62 | 0.84 | 3.1E-03 | 7.6E-03 | 4.6E-05 |
| 0.70 | 0.90 | 1.0E-05 | 9.6E-01 | 3.6E-04 |
| 0.68 | 0.88 | 3.5E-02 | 2.0E-04 | 1.1E-04 |
| 1.15 | 1.51 | 6.1E-04 | 4.6E-02 | 6.0E-05 |
| 0.64 | 0.88 | 3.4E-02 | 2.9E-03 | 5.9E-04 |
| 0.64 | 0.87 | 7.3E-04 | 1.3E-01 | 1.6E-04 |
| 0.68 | 0.89 | 3.7E-03 | 3.9E-02 | 3.9E-04 |
| 0.65 | 0.85 | 5.4E-04 | 7.8E-03 | 4.9E-05 |
| 0.64 | 0.87 | 4.3E-03 | 1.4E-02 | 2.8E-04 |
| 1.14 | 1.50 | 1.8E-04 | 1.3E-01 | 1.8E-04 |
| 0.52 | 0.82 | 3.2E-03 | 1.8E-02 | 4.5E-04 |

d.

an additive model.
