# Supplementary material
Source: PubMed Central journal article supplement (PMC3535539)
Supplement: NIHMS392966-supplement-Supp_Table_S3.pdf [file NIHMS392966-supplement-Supp_Table_S3.pdf]

**Supplementary Table 2. Association Analyses of TNIP1 Region including Imputed SNPs**

| SNP name         | position <sup>a</sup> | Allele A <sup>b</sup> | Allele B <sup>b</sup> | Mean Call <sup>c</sup> | Inf <sup>d</sup> | Cases<br>MAF <sup>e</sup> | Controls<br>MAF <sup>e</sup> | OR <sup>f</sup> |
|------------------|-----------------------|-----------------------|-----------------------|------------------------|------------------|---------------------------|------------------------------|-----------------|
| rs2233299        | 150405660             | A                     | G                     | 1.000                  | 1.000            | 0.311                     | 0.260                        | 1.30            |
| rs13153275       | 150408592             | G                     | C                     | 0.992                  | 0.982            | 0.312                     | 0.265                        | 1.28            |
| rs7713567        | 150411148             | T                     | C                     | 0.946                  | 0.905            | 0.378                     | 0.326                        | 1.30            |
| rs6579837        | 150415087             | T                     | G                     | 0.982                  | 0.921            | 0.142                     | 0.092                        | 1.86            |
| <b>rs2233290</b> | 150416696             | C                     | G                     | 0.992                  | 0.957            | 0.141                     | 0.088                        | 1.92            |
| rs1422673        | 150419181             | T                     | C                     | 1.000                  | 1.000            | 0.264                     | 0.188                        | 1.57            |
| rs2042234        | 150419324             | G                     | A                     | 0.995                  | 0.976            | 0.142                     | 0.088                        | 1.90            |
| rs2233287        | 150420290             | A                     | G                     | 1.000                  | 1.000            | 0.142                     | 0.087                        | 1.88            |
| rs17111708       | 150423700             | A                     | G                     | 0.992                  | 0.963            | 0.146                     | 0.091                        | 1.89            |
| rs7732451        | 150424405             | G                     | A                     | 0.977                  | 0.912            | 0.182                     | 0.126                        | 1.65            |
| 5-150425036      | 150425036             | C                     | T                     | 0.992                  | 0.962            | 0.146                     | 0.091                        | 1.89            |
| rs10057690       | 150425408             | C                     | T                     | 0.992                  | 0.962            | 0.146                     | 0.091                        | 1.89            |
| rs1559127        | 150426946             | C                     | T                     | 0.988                  | 0.952            | 0.175                     | 0.111                        | 1.86            |
| rs6880110        | 150427283             | G                     | A                     | 0.977                  | 0.925            | 0.210                     | 0.145                        | 1.65            |
| rs6861227        | 150427321             | G                     | T                     | 0.977                  | 0.925            | 0.210                     | 0.145                        | 1.65            |
| rs59926079       | 150427936             | G                     | A                     | 0.993                  | 0.967            | 0.146                     | 0.090                        | 1.91            |
| rs58474444       | 150428073             | G                     | T                     | 0.994                  | 0.968            | 0.146                     | 0.090                        | 1.91            |
| rs1862364        | 150428569             | G                     | A                     | 0.982                  | 0.939            | 0.210                     | 0.145                        | 1.64            |
| 5-150429413      | 150429413             | T                     | C                     | 0.995                  | 0.974            | 0.145                     | 0.089                        | 1.91            |
| rs4958881        | 150430429             | C                     | T                     | 1.000                  | 1.000            | 0.176                     | 0.111                        | 1.82            |
| 5-150431268      | 150431268             | T                     | A                     | 0.986                  | 0.949            | 0.150                     | 0.095                        | 1.86            |
| rs3792785        | 150431843             | C                     | T                     | 1.000                  | 1.000            | 0.159                     | 0.104                        | 1.75            |
| rs13160369       | 150432389             | G                     | C                     | 0.990                  | 0.967            | 0.224                     | 0.159                        | 1.57            |
| rs6869605        | 150433059             | C                     | A                     | 0.995                  | 0.980            | 0.192                     | 0.126                        | 1.76            |
| 5-150433577      | 150433577             | T                     | C                     | 0.992                  | 0.966            | 0.154                     | 0.099                        | 1.81            |
| 5-150434081      | 150434081             | A                     | G                     | 0.991                  | 0.965            | 0.190                     | 0.125                        | 1.78            |
| rs1107239        | 150434799             | A                     | T                     | 0.992                  | 0.963            | 0.159                     | 0.103                        | 1.80            |
| rs4958882        | 150434980             | G                     | C                     | 0.991                  | 0.965            | 0.190                     | 0.124                        | 1.78            |
| rs3792784        | 150435865             | G                     | A                     | 0.993                  | 0.970            | 0.159                     | 0.103                        | 1.80            |
| rs3792783        | 150435925             | G                     | A                     | 1.000                  | 1.000            | 0.223                     | 0.157                        | 1.58            |
| rs7731150        | 150436585             | A                     | G                     | 0.990                  | 0.957            | 0.159                     | 0.103                        | 1.82            |
| rs7708392        | 150437678             | C                     | G                     | 0.976                  | 0.944            | 0.333                     | 0.254                        | 1.51            |
| rs6889239        | 150437964             | C                     | T                     | 0.976                  | 0.944            | 0.333                     | 0.254                        | 1.51            |
| rs10036748       | 150438339             | T                     | C                     | 0.976                  | 0.950            | 0.332                     | 0.254                        | 1.49            |
| rs7719549        | 150440240             | T                     | C                     | 0.979                  | 0.908            | 0.153                     | 0.098                        | 1.89            |
| rs960709         | 150441242             | G                     | A                     | 0.973                  | 0.944            | 0.336                     | 0.258                        | 1.49            |
| rs13168551       | 150442831             | C                     | T                     | 1.000                  | 1.000            | 0.492                     | 0.423                        | 1.35            |
| rs10067288       | 150509855             | A                     | G                     | 0.992                  | 0.951            | 0.108                     | 0.079                        | 1.47            |
| rs10077099       | 150510867             | C                     | T                     | 0.992                  | 0.954            | 0.108                     | 0.079                        | 1.48            |
| rs28386800       | 150511438             | T                     | A                     | 0.992                  | 0.954            | 0.108                     | 0.079                        | 1.48            |
| rs13167040       | 150521856             | A                     | G                     | 0.995                  | 0.970            | 0.108                     | 0.078                        | 1.49            |
| rs10072803       | 150522414             | T                     | G                     | 0.995                  | 0.971            | 0.108                     | 0.078                        | 1.49            |

|            |           |   |   |       |       |       |       |      |
|------------|-----------|---|---|-------|-------|-------|-------|------|
| rs10040086 | 150525260 | G | A | 0.996 | 0.974 | 0.108 | 0.078 | 1.49 |
| rs10072012 | 150527331 | T | C | 0.995 | 0.968 | 0.108 | 0.078 | 1.49 |
| rs10080029 | 150527544 | C | T | 0.994 | 0.965 | 0.108 | 0.078 | 1.49 |
| rs10476763 | 150528477 | A | G | 0.992 | 0.952 | 0.107 | 0.077 | 1.49 |

a. Base-pair position based on NCBI build 36, HG18.

b. Minor allele (Allele A) and alternative allele (Allele B).

c. Average maximum posterior call from ImputeV2.0 (see Web site). Those SNPs that were genotyped have p Genome data HapMap3 reference genotyping data and only SNPs with >0.90 maximum posterior calls are included.

d. Information (Inf) is a measure of the observed statistical information for the estimate of SNP allele frequency with 1.00 information were genotyped.

e. MAF are the Case and control minor allele frequencies.

f. Odds ratio (OR) and 95% confidence intervals (CI) and are based on an additive model.

g. Association tests and p values for an additive model were determined using SNPTTEST v2 with the SCORE test that were outputted from Impute V2.0.

h. The p values are shown for analyses using no covariates and covariates for population substructure (first five after conditioning on the rs2233290 SNP are shown).

| Lower<br>95% OR<br>CI <sup>f</sup> | Upper<br>95% OR<br>CI <sup>f</sup> | p value<br>no<br>covariate | p value<br>all<br>covariate | p value<br>conditioning on<br>rs2233290 <sup>g</sup> |
|------------------------------------|------------------------------------|----------------------------|-----------------------------|------------------------------------------------------|
| 1.13                               | 1.49                               | 2.34E-04                   | 3.04E-04                    | 3.44E-01                                             |
| 1.11                               | 1.47                               | 5.03E-04                   | 7.26E-04                    | 4.05E-01                                             |
| 1.13                               | 1.50                               | 1.62E-04                   | 2.12E-04                    | 1.66E-01                                             |
| 1.50                               | 2.31                               | 1.23E-08                   | <b>2.13E-08</b>             | 4.52E-01                                             |
| 1.54                               | 2.38                               | 1.95E-09                   | <b>3.39E-09</b>             | <b>conditioned SNP</b>                               |
| 1.35                               | 1.83                               | 2.62E-09                   | <b>5.65E-09</b>             | 1.67E-02                                             |
| 1.54                               | 2.35                               | 1.98E-09                   | <b>3.45E-09</b>             | 9.43E-01                                             |
| 1.52                               | 2.32                               | 2.35E-09                   | <b>4.54E-09</b>             | 8.28E-01                                             |
| 1.53                               | 2.33                               | 1.85E-09                   | <b>2.98E-09</b>             | 5.23E-01                                             |
| 1.37                               | 1.99                               | 5.44E-08                   | 1.42E-07                    | 5.64E-01                                             |
| 1.53                               | 2.33                               | 1.68E-09                   | <b>2.71E-09</b>             | 4.65E-01                                             |
| 1.53                               | 2.33                               | 1.63E-09                   | <b>2.61E-09</b>             | 4.44E-01                                             |
| 1.53                               | 2.26                               | 9.00E-11                   | <b>3.04E-10</b>             | 1.01E-02                                             |
| 1.39                               | 1.96                               | 3.39E-09                   | <b>1.78E-08</b>             | 4.66E-02                                             |
| 1.39                               | 1.96                               | 3.38E-09                   | <b>1.79E-08</b>             | 4.64E-02                                             |
| 1.55                               | 2.35                               | 1.13E-09                   | <b>1.78E-09</b>             | 2.82E-01                                             |
| 1.55                               | 2.35                               | 1.13E-09                   | <b>1.77E-09</b>             | 2.80E-01                                             |
| 1.38                               | 1.95                               | 3.64E-09                   | <b>1.96E-08</b>             | 4.47E-02                                             |
| 1.55                               | 2.36                               | 1.01E-09                   | <b>1.57E-09</b>             | 2.42E-01                                             |
| 1.51                               | 2.20                               | 1.80E-10                   | <b>5.56E-10</b>             | 1.48E-02                                             |
| 1.51                               | 2.29                               | 3.18E-09                   | <b>4.68E-09</b>             | 4.73E-01                                             |
| 1.43                               | 2.12                               | 2.29E-08                   | <b>2.75E-08</b>             | 5.86E-01                                             |
| 1.33                               | 1.86                               | 1.81E-08                   | 8.02E-08                    | 6.09E-02                                             |
| 1.46                               | 2.11                               | 4.55E-10                   | <b>1.34E-09</b>             | 1.65E-02                                             |
| 1.48                               | 2.22                               | 8.55E-09                   | <b>1.16E-08</b>             | 5.43E-01                                             |
| 1.48                               | 2.14                               | 3.70E-10                   | <b>1.03E-09</b>             | 1.54E-02                                             |
| 1.48                               | 2.20                               | 7.16E-09                   | <b>8.02E-09</b>             | 3.63E-01                                             |
| 1.48                               | 2.15                               | 2.90E-10                   | <b>8.54E-10</b>             | 1.26E-02                                             |
| 1.47                               | 2.20                               | 8.00E-09                   | <b>9.04E-09</b>             | 3.52E-01                                             |
| 1.34                               | 1.86                               | 1.12E-08                   | 6.69E-08                    | 3.85E-02                                             |
| 1.49                               | 2.22                               | 5.45E-09                   | <b>6.04E-09</b>             | 3.06E-01                                             |
| 1.31                               | 1.75                               | 3.62E-09                   | <b>1.16E-08</b>             | 1.55E-03                                             |
| 1.31                               | 1.75                               | 3.60E-09                   | <b>1.14E-08</b>             | 1.53E-03                                             |
| 1.30                               | 1.72                               | 9.76E-09                   | <b>2.57E-08</b>             | 2.91E-03                                             |
| 1.53                               | 2.34                               | 2.93E-09                   | <b>3.34E-09</b>             | 3.14E-01                                             |
| 1.29                               | 1.71                               | 1.36E-08                   | <b>3.79E-08</b>             | 3.54E-03                                             |
| 1.19                               | 1.53                               | 5.70E-06                   | 2.48E-06                    | 1.01E-02                                             |
| 1.17                               | 1.85                               | 5.00E-04                   | 9.06E-04                    | 1.97E-04                                             |
| 1.17                               | 1.86                               | 4.61E-04                   | 8.42E-04                    | 1.82E-04                                             |
| 1.18                               | 1.86                               | 4.41E-04                   | 8.08E-04                    | 1.73E-04                                             |
| 1.19                               | 1.87                               | 3.28E-04                   | 6.09E-04                    | 1.26E-04                                             |
| 1.19                               | 1.87                               | 3.29E-04                   | 6.09E-04                    | 1.26E-04                                             |

|      |      |          |          |          |
|------|------|----------|----------|----------|
| 1.18 | 1.87 | 3.35E-04 | 6.20E-04 | 1.29E-04 |
| 1.19 | 1.87 | 3.30E-04 | 6.26E-04 | 1.29E-04 |
| 1.19 | 1.87 | 3.29E-04 | 6.32E-04 | 1.30E-04 |
| 1.18 | 1.88 | 3.27E-04 | 6.78E-04 | 1.37E-04 |

osteior call rates of 1.00. SNPs were imputed using 1000  
luded.

determined by the SNPTEST v2 algorithm (see web site). SNPs

st option. Analyses were performed using allele probabilities

re principal components and gender). In addition, the p values
