# Supplementary material
Source: PubMed Central journal article supplement (PMC3535539)
Supplement: NIHMS392966-supplement-Supp_Table_S4.pdf [file NIHMS392966-supplement-Supp_Table_S4.pdf]

**Supplementary Table 3. Conditioning Studies for MHC Associations in EOMG<sup>a</sup>**

| Marker/Amino Acid/HLA determinant <sup>b</sup> | base pair position (HG18) | Genotype Posterior Prob. <sup>c</sup> | Inf <sup>d</sup> | Allele 1 (Minor Allele) | Allele 2 | MAF (Case) <sup>e</sup> | MAF (Control) |
|------------------------------------------------|---------------------------|---------------------------------------|------------------|-------------------------|----------|-------------------------|---------------|
| 6-30018489                                     | 30018489                  | 0.998                                 | 0.979            | G                       | A        | 0.06                    | 0.03          |
| HLA-A AA97                                     | 30018729                  | 0.999                                 | 0.989            | T                       | I        | 0.06                    | 0.03          |
| 6-30018795                                     | 30018795                  | 0.998                                 | 0.979            | G                       | A        | 0.06                    | 0.03          |
| 6-30018845                                     | 30018845                  | 0.998                                 | 0.977            | G                       | A        | 0.06                    | 0.03          |
| 6-30019484                                     | 30019484                  | 0.999                                 | 0.994            | C                       | G        | 0.06                    | 0.03          |
| 6-30019836                                     | 30019836                  | 0.999                                 | 0.994            | G                       | T        | 0.06                    | 0.03          |
| HLA-A*3101                                     | 30019970                  | 0.999                                 | 0.991            | SPEC                    | other    | 0.06                    | 0.03          |
| 6-30020128                                     | 30020128                  | 1.000                                 | 0.995            | G                       | C        | 0.06                    | 0.03          |
| 6-30020864                                     | 30020864                  | 0.999                                 | 0.995            | C                       | A        | 0.06                    | 0.03          |
| 6-30020869                                     | 30020869                  | 0.999                                 | 0.994            | G                       | C        | 0.06                    | 0.03          |
| 6-30020871                                     | 30020871                  | 1.000                                 | 0.995            | C                       | A        | 0.06                    | 0.03          |
| 6-30020872                                     | 30020872                  | 0.999                                 | 0.994            | T                       | A        | 0.06                    | 0.03          |
| 6-30020875                                     | 30020875                  | 0.999                                 | 0.993            | G                       | A        | 0.06                    | 0.03          |
| 6-30020876                                     | 30020876                  | 0.999                                 | 0.993            | G                       | A        | 0.06                    | 0.03          |
| 6-30020879                                     | 30020879                  | 0.999                                 | 0.994            | C                       | A        | 0.06                    | 0.03          |
| 6-30020880                                     | 30020880                  | 1.000                                 | 0.995            | T                       | C        | 0.06                    | 0.03          |
| rs1061235                                      | 30021277                  | 0.999                                 | 0.989            | T                       | A        | 0.06                    | 0.03          |
| rs6930977                                      | 30543267                  | typed                                 | typed            | A                       | G        | 0.19                    | 0.17          |
| rs2157605                                      | 30562055                  | 0.997                                 | 0.992            | T                       | C        | 0.20                    | 0.18          |
| rs3130117                                      | 30616935                  | 0.988                                 | 0.958            | G                       | A        | 0.33                    | 0.12          |
| rs12665339                                     | 30709211                  | 1.000                                 | 1.000            | A                       | G        | 0.18                    | 0.17          |
| rs9262130                                      | 30711498                  | 0.994                                 | 0.982            | C                       | T        | 0.34                    | 0.13          |
| rs9262135                                      | 30726885                  | 0.996                                 | 0.987            | A                       | G        | 0.34                    | 0.13          |
| rs9405048                                      | 30778271                  | 0.974                                 | 0.917            | C                       | T        | 0.19                    | 0.17          |
| rs3129973                                      | 30829122                  | 0.992                                 | 0.978            | C                       | T        | 0.35                    | 0.13          |
| rs3130673                                      | 30854498                  | 0.994                                 | 0.983            | G                       | T        | 0.35                    | 0.13          |
| rs3131050                                      | 30868004                  | 0.995                                 | 0.986            | T                       | C        | 0.35                    | 0.13          |
| rs886424                                       | 30889981                  | typed                                 | typed            | C                       | T        | 0.37                    | 0.14          |
| rs1264353                                      | 30895741                  | 0.999                                 | 0.997            | C                       | A        | 0.37                    | 0.14          |
| rs2517578                                      | 30919244                  | 0.966                                 | 0.905            | G                       | C        | 0.37                    | 0.15          |
| rs2535334                                      | 30920975                  | 0.969                                 | 0.912            | G                       | A        | 0.38                    | 0.15          |
| rs2535333                                      | 30921076                  | 0.964                                 | 0.917            | G                       | A        | 0.46                    | 0.22          |
| rs2535332                                      | 30921228                  | 0.974                                 | 0.922            | C                       | T        | 0.37                    | 0.14          |
| rs2517576                                      | 30923014                  | 0.971                                 | 0.935            | G                       | A        | 0.46                    | 0.20          |
| rs2263298                                      | 30928352                  | 0.974                                 | 0.923            | C                       | T        | 0.37                    | 0.14          |
| rs2844659                                      | 30932511                  | typed                                 | typed            | C                       | T        | 0.46                    | 0.20          |
| rs2535328                                      | 30933973                  | 0.980                                 | 0.942            | C                       | T        | 0.37                    | 0.13          |
| rs2844657                                      | 30937501                  | typed                                 | typed            | A                       | G        | 0.46                    | 0.20          |
| rs2844656                                      | 30942310                  | 0.981                                 | 0.943            | A                       | G        | 0.37                    | 0.13          |
| rs1264326                                      | 30959888                  | 0.972                                 | 0.915            | C                       | A        | 0.37                    | 0.14          |
| rs1264322                                      | 30965873                  | 0.999                                 | 0.998            | G                       | A        | 0.37                    | 0.13          |
| rs1264319                                      | 30970402                  | 0.968                                 | 0.929            | C                       | T        | 0.46                    | 0.21          |
| rs1264318                                      | 30971509                  | 0.955                                 | 0.904            | C                       | G        | 0.47                    | 0.22          |
| rs886422                                       | 30972258                  | 0.999                                 | 0.997            | C                       | T        | 0.37                    | 0.13          |
| rs1264310                                      | 30981584                  | 0.971                                 | 0.918            | C                       | A        | 0.37                    | 0.14          |
| rs1264308                                      | 30987966                  | 0.999                                 | 0.998            | C                       | T        | 0.37                    | 0.13          |

|             |          |       |       |       |       |      |      |
|-------------|----------|-------|-------|-------|-------|------|------|
| rs4678      | 31001920 | typed | typed | G     | A     | 0.45 | 0.20 |
| rs3094088   | 31002944 | 0.980 | 0.944 | T     | A     | 0.37 | 0.15 |
| rs3095155   | 31007030 | 0.980 | 0.939 | G     | C     | 0.37 | 0.15 |
| rs3095154   | 31007031 | 0.976 | 0.947 | G     | A     | 0.47 | 0.22 |
| rs3095153   | 31007174 | 0.980 | 0.940 | G     | A     | 0.37 | 0.15 |
| rs3131787   | 31007503 | 0.979 | 0.952 | T     | C     | 0.45 | 0.20 |
| rs3095152   | 31007629 | 0.980 | 0.940 | G     | A     | 0.37 | 0.15 |
| rs3132581   | 31021437 | 0.987 | 0.964 | G     | A     | 0.37 | 0.14 |
| rs3130781   | 31022531 | 0.969 | 0.933 | T     | C     | 0.47 | 0.21 |
| rs3094086   | 31027370 | 0.990 | 0.972 | G     | A     | 0.37 | 0.14 |
| rs3132580   | 31028103 | typed | typed | G     | A     | 0.38 | 0.14 |
| rs3095089   | 31041773 | typed | typed | G     | T     | 0.45 | 0.18 |
| rs3132579   | 31048968 | 0.990 | 0.979 | T     | C     | 0.45 | 0.17 |
| rs12179536  | 31101569 | typed | typed | A     | G     | 0.19 | 0.18 |
| rs3130544   | 31166319 | typed | typed | C     | A     | 0.40 | 0.13 |
| rs2233974   | 31187995 | 0.996 | 0.992 | C     | G     | 0.46 | 0.18 |
| rs2233956   | 31189184 | typed | typed | T     | C     | 0.43 | 0.18 |
| rs3130557   | 31202682 | 0.999 | 0.997 | C     | T     | 0.41 | 0.14 |
| rs1265115   | 31225054 | 0.992 | 0.982 | C     | A     | 0.28 | 0.32 |
| rs1265109   | 31227568 | typed | typed | G     | T     | 0.26 | 0.27 |
| rs743401    | 31233137 | 0.974 | 0.953 | T     | C     | 0.22 | 0.41 |
| rs3095239   | 31234769 | 0.954 | 0.925 | G     | A     | 0.27 | 0.49 |
| rs3094187   | 31234923 | 0.954 | 0.926 | T     | C     | 0.27 | 0.50 |
| rs7750641   | 31237289 | typed | typed | C     | T     | 0.41 | 0.13 |
| rs885948    | 31248511 | 0.998 | 0.997 | G     | A     | 0.28 | 0.51 |
| rs1265156   | 31250276 | typed | typed | C     | A     | 0.29 | 0.32 |
| rs887464    | 31253899 | typed | typed | T     | C     | 0.29 | 0.54 |
| rs6921663   | 31262599 | 1.000 | 1.000 | A     | G     | 0.23 | 0.24 |
| rs4713444   | 31263527 | 0.968 | 0.938 | A     | G     | 0.34 | 0.41 |
| rs6899874   | 31270307 | 0.976 | 0.942 | C     | A     | 0.23 | 0.24 |
| rs28397282  | 31273825 | 0.970 | 0.928 | C     | T     | 0.23 | 0.24 |
| rs9391711   | 31274273 | 0.971 | 0.929 | C     | T     | 0.22 | 0.24 |
| rs4122189   | 31275906 | typed | typed | C     | T     | 0.23 | 0.24 |
| rs9366769   | 31277268 | 0.965 | 0.914 | T     | C     | 0.23 | 0.24 |
| HLA-C*12    | 31346171 | 0.999 | 0.989 | SPEC  | other | 0.06 | 0.04 |
| HLA-C*1203  | 31346171 | 0.999 | 0.988 | SPEC  | other | 0.05 | 0.03 |
| 6-31346738  | 31346738 | 0.994 | 0.989 | T     | C     | 0.57 | 0.47 |
| 6-31346974  | 31346974 | 0.999 | 0.987 | G     | A     | 0.05 | 0.03 |
| 6-31347428  | 31347428 | 0.961 | 0.914 | C     | G     | 0.45 | 0.21 |
| HLA-C AA91  | 31347429 | 0.961 | 0.913 | K     | N     | 0.45 | 0.21 |
| rs2524069   | 31352768 | 0.999 | 0.997 | A     | T     | 0.42 | 0.16 |
| rs3134792   | 31420305 | 0.977 | 0.927 | T     | G     | 0.40 | 0.13 |
| 6-31430295  | 31430295 | 0.993 | 0.944 | A     | C     | 0.08 | 0.06 |
| 6-31430432  | 31430432 | 0.993 | 0.944 | A     | C     | 0.08 | 0.06 |
| 6-31430769  | 31430769 | 0.997 | 0.993 | T     | A     | 0.41 | 0.14 |
| HLA-B*08    | 31431272 | 0.998 | 0.994 | SPEC  | other | 0.41 | 0.13 |
| HLA-B*40    | 31431272 | 0.999 | 0.994 | SPEC  | other | 0.10 | 0.08 |
| HLA-B*4001  | 31431272 | 0.993 | 0.944 | SPEC  | other | 0.08 | 0.06 |
| 6-31431395  | 31431395 | 0.996 | 0.989 | G     | C     | 0.41 | 0.13 |
| 6-31431485  | 31431485 | 0.997 | 0.991 | C     | T     | 0.41 | 0.14 |
| HLA-B AA172 | 31432030 | 0.992 | 0.940 | W     | L     | 0.08 | 0.06 |
| HLA-B AA168 | 31432042 | 0.992 | 0.940 | T     | S     | 0.08 | 0.06 |
| 6-31432043  | 31432043 | 0.992 | 0.941 | T     | A     | 0.08 | 0.06 |
| HLA-B AA139 | 31432129 | 0.982 | 0.972 | other | N     | 0.68 | 0.41 |

|            |          |       |       |       |   |      |      |
|------------|----------|-------|-------|-------|---|------|------|
| 6-31432130 | 31432130 | 0.982 | 0.972 | A     | G | 0.68 | 0.41 |
| 6-31432354 | 31432354 | 0.993 | 0.944 | G     | T | 0.08 | 0.06 |
| 6-31432394 | 31432394 | 0.996 | 0.989 | A     | C | 0.43 | 0.17 |
| 6-31432729 | 31432729 | 0.992 | 0.943 | G     | A | 0.09 | 0.07 |
| rs1811197  | 31435639 | 0.996 | 0.990 | G     | A | 0.47 | 0.19 |
| rs2523567  | 31437994 | 0.999 | 0.998 | G     | C | 0.53 | 0.23 |
| rs2844559  | 31448054 | 0.987 | 0.963 | C     | T | 0.42 | 0.14 |
| rs3099844  | 31556955 | typed | typed | C     | A | 0.39 | 0.13 |
| rs3094011  | 31559815 | 0.991 | 0.972 | T     | C | 0.39 | 0.13 |
| rs3132451  | 31690004 | 0.996 | 0.990 | C     | G | 0.44 | 0.20 |
| rs3130070  | 31699787 | 0.972 | 0.931 | A     | G | 0.43 | 0.18 |
| rs3130624  | 31705854 | 0.974 | 0.936 | A     | G | 0.42 | 0.18 |
| rs3130626  | 31706468 | 0.976 | 0.943 | A     | G | 0.43 | 0.18 |
| rs2736157  | 31708799 | 0.984 | 0.961 | A     | G | 0.43 | 0.19 |
| rs3130627  | 31708830 | 0.981 | 0.952 | G     | T | 0.43 | 0.19 |
| rs3115663  | 31709822 | typed | typed | T     | C | 0.44 | 0.19 |
| rs11229    | 31711749 | typed | typed | A     | G | 0.44 | 0.19 |
| rs10885    | 31712570 | 0.984 | 0.960 | C     | T | 0.44 | 0.19 |
| rs3130628  | 31717251 | 0.975 | 0.942 | T     | C | 0.42 | 0.18 |
| rs3130047  | 31718458 | 0.978 | 0.947 | C     | T | 0.43 | 0.19 |
| rs3117583  | 31727555 | 0.969 | 0.925 | A     | G | 0.43 | 0.19 |
| rs3117582  | 31728499 | 0.978 | 0.933 | T     | G | 0.36 | 0.12 |
| rs3132449  | 31733992 | 0.981 | 0.941 | C     | T | 0.36 | 0.12 |
| rs3117580  | 31738947 | 0.990 | 0.974 | G     | A | 0.43 | 0.19 |
| rs3130618  | 31740113 | typed | typed | C     | A | 0.44 | 0.19 |
| rs9267531  | 31744721 | 0.981 | 0.941 | A     | G | 0.36 | 0.12 |
| rs3131383  | 31812273 | 0.998 | 0.995 | G     | T | 0.37 | 0.12 |
| rs3132445  | 31820175 | 0.993 | 0.978 | G     | A | 0.36 | 0.12 |
| rs3130484  | 31823861 | 0.994 | 0.980 | T     | C | 0.36 | 0.12 |
| rs3131379  | 31829012 | typed | typed | G     | A | 0.37 | 0.12 |
| rs3117574  | 31833209 | 0.994 | 0.981 | G     | A | 0.36 | 0.12 |
| rs3117575  | 31834232 | 0.992 | 0.973 | T     | C | 0.36 | 0.12 |
| rs3117577  | 31835453 | 0.998 | 0.993 | A     | G | 0.37 | 0.12 |
| rs3115671  | 31842324 | 0.997 | 0.992 | C     | A | 0.37 | 0.12 |
| rs915652   | 31857121 | 0.997 | 0.991 | C     | T | 0.37 | 0.12 |
| rs599707   | 31916415 | 0.998 | 0.995 | C     | T | 0.37 | 0.12 |
| rs558702   | 31978305 | typed | typed | G     | A | 0.36 | 0.12 |
| rs497309   | 32000463 | 0.980 | 0.941 | A     | C | 0.34 | 0.12 |
| rs1270942  | 32026839 | typed | typed | A     | G | 0.35 | 0.12 |
| rs389884   | 32048876 | typed | typed | A     | G | 0.35 | 0.12 |
| rs1150752  | 32172704 | 0.997 | 0.992 | T     | C | 0.35 | 0.12 |
| rs7775397  | 32369230 | typed | typed | T     | G | 0.35 | 0.12 |
| rs1265754  | 32411670 | 0.999 | 0.998 | A     | T | 0.34 | 0.12 |
| rs3117103  | 32457535 | 0.999 | 0.996 | T     | A | 0.35 | 0.13 |
| rs3129953  | 32469799 | 0.965 | 0.919 | C     | T | 0.43 | 0.19 |
| rs1980493  | 32471193 | 0.999 | 0.999 | T     | C | 0.42 | 0.17 |
| rs3135353  | 32500855 | typed | typed | C     | T | 0.41 | 0.16 |
| rs3129891  | 32523058 | 0.999 | 0.997 | G     | A | 0.46 | 0.21 |
| rs2760991  | 32623336 | 0.986 | 0.933 | C     | T | 0.04 | 0.12 |
| 6-32656528 | 32656528 | 0.999 | 0.997 | G     | A | 0.04 | 0.12 |
| 6-32657541 | 32657541 | 0.997 | 0.992 | G     | A | 0.35 | 0.13 |
| DRB1 AA107 | 32659917 | 0.997 | 0.993 | T     | N | 0.35 | 0.13 |
| DRB1 AA104 | 32659926 | 0.999 | 0.997 | other | Q | 0.04 | 0.12 |
| DRB1 AA104 | 32659926 | 0.997 | 0.993 | other | R | 0.35 | 0.13 |
| 6-32659931 | 32659931 | 0.998 | 0.967 | A     | G | 0.04 | 0.03 |

|               |          |       |       |       |       |      |      |
|---------------|----------|-------|-------|-------|-------|------|------|
| 6-32659988    | 32659988 | 0.999 | 0.997 | C     | T     | 0.04 | 0.12 |
| HLA-DRB1*0301 | 32660042 | 0.997 | 0.992 | SPEC  | other | 0.35 | 0.13 |
| HLA-DRB1*07   | 32660042 | 0.999 | 0.997 | SPEC  | other | 0.04 | 0.12 |
| HLA-DRB1*16   | 32660042 | 1.000 | 0.988 | SPEC  | other | 0.03 | 0.01 |
| DRB1 AA60     | 32660058 | 0.999 | 0.997 | other | L     | 0.04 | 0.12 |
| DRB1 AA56     | 32660070 | 0.997 | 0.991 | other | Y     | 0.36 | 0.14 |
| DRB1 AA55     | 32660073 | 0.999 | 0.997 | R     | Q     | 0.04 | 0.12 |
| DRB1 AA44     | 32660106 | 0.999 | 0.997 | E     | K     | 0.04 | 0.12 |
| 6-32660107    | 32660107 | 0.999 | 0.997 | C     | T     | 0.04 | 0.12 |
| DRB1 AA43     | 32660109 | 0.999 | 0.997 | other | Y     | 0.04 | 0.12 |
| DRB1 AA41     | 32660115 | 0.999 | 0.997 | other | G     | 0.04 | 0.12 |
| HLA-DQA1*02   | 32716284 | 1.000 | 0.999 | SPEC  | other | 0.04 | 0.12 |
| DQA1 AA48     | 32717125 | 0.993 | 0.981 | Y     | F     | 0.08 | 0.19 |
| DQA1 AA70     | 32717191 | 1.000 | 0.999 | other | K     | 0.04 | 0.12 |
| DQA1 AA75     | 32717206 | 1.000 | 0.999 | other | H     | 0.04 | 0.12 |
| 6-32717211    | 32717211 | 1.000 | 0.999 | T     | C     | 0.04 | 0.12 |
| DQA1 AA77     | 32717212 | 1.000 | 0.999 | F     | L     | 0.04 | 0.12 |
| 6-32737909    | 32737909 | 1.000 | 0.996 | C     | G     | 0.03 | 0.01 |
| DQB1 AA159    | 32737910 | 1.000 | 0.996 | Q     | H     | 0.03 | 0.01 |
| HLA-DQB1*0502 | 32739039 | 1.000 | 0.996 | SPEC  | other | 0.03 | 0.01 |
| HLA-DQB1*0604 | 32739039 | 0.995 | 0.962 | SPEC  | other | 0.07 | 0.04 |
| 6-32740565    | 32740565 | 0.990 | 0.977 | A     | G     | 0.22 | 0.20 |
| DQB1 AA120    | 32740576 | 0.990 | 0.977 | other | Y     | 0.22 | 0.20 |
| DQB1 AA90     | 32740666 | 1.000 | 0.996 | other | S     | 0.03 | 0.01 |
| 6-32740667    | 32740667 | 1.000 | 0.996 | C     | T     | 0.03 | 0.01 |
| DPB1 AA65     | 33156520 | 0.967 | 0.946 | A     | V     | 0.50 | 0.45 |
| DPB1 AA84     | 33156577 | 0.971 | 0.953 | other | A     | 0.49 | 0.44 |

a. This Table provides a summary of results before and after conditioning on particular HLA SNPs. Conditioning on HLA-DRB1\*0301 is shown for comparison. Results for conditioning on HLA-DRB1\*0301 (see Table S2) and imputed SNPs. All imputed SNPs had posterior probabilities and used the genotype probabilities. P values are provided for the most significant SNPs.

b. The nucleotide is shown for SNPs (rs numbers and chromosomal base pair positions). Where the AA is compared with multiple other AAs, "other" is used to represent all alternative alleles (see Table S2). Where HLA classical alleles are provided, the specificity is indicated by the asterisk.

c. Post Prob: The maximum posterior probabilities estimated from the imputed probabilities.

d. Information (Inf) is a measure of the observed statistical information for the estimate of  $\beta$  were genotyped.

e. MAF: Minor allele frequencies were estimated from probabilities (SNPTEST V2).

f. p values before conditioning using population substructure and gender as covariates.

g. p value after conditioning on the allele(s) listed in the heading line.

h. Odds ratios after conditioning on the alleles listed in the heading line,

i. COND: Indicates the gene(s) or marker(s) used in the conditional analyses. For all cond

| p-value <sup>f</sup> | Odds Ratio minor allele,<br>L95%, U95% Confidence<br>Limits |      |      | Cond. p-<br>value HLA<br>B*08 <sup>g</sup> | Odds Ratio minor allele, L95%,<br>U95% Confidence Limits, After<br>Conditioning on B*08 <sup>h</sup> |      |      | Cond. p-<br>value HLA<br>DRB1*0301 <sup>g</sup> | Cond. p-<br>value All<br>HLA B <sup>g</sup> | Cond. p-<br>value HLA<br>B*08 B*07<br>B*4001<br>B*4402 <sup>g</sup> |  |
|----------------------|-------------------------------------------------------------|------|------|--------------------------------------------|------------------------------------------------------------------------------------------------------|------|------|-------------------------------------------------|---------------------------------------------|---------------------------------------------------------------------|--|
|                      |                                                             |      |      |                                            |                                                                                                      |      |      |                                                 |                                             |                                                                     |  |
| 1.1E-06              | 2.30                                                        | 1.65 | 3.22 | 1.5E-08                                    | 2.88                                                                                                 | 2.00 | 4.15 | 1.4E-07                                         | 3.5E-05                                     | 8.5E-06                                                             |  |
| 5.5E-06              | 2.09                                                        | 1.52 | 2.86 | 4.7E-08                                    | 2.63                                                                                                 | 1.86 | 3.71 | 1.3E-06                                         | 6.3E-05                                     | 1.7E-05                                                             |  |
| 1.1E-06              | 2.30                                                        | 1.65 | 3.22 | 1.5E-08                                    | 2.88                                                                                                 | 2.00 | 4.15 | 1.4E-07                                         | 3.5E-05                                     | 8.4E-06                                                             |  |
| 1.1E-06              | 2.30                                                        | 1.65 | 3.22 | 1.5E-08                                    | 2.88                                                                                                 | 2.00 | 4.15 | 1.4E-07                                         | 3.5E-05                                     | 8.4E-06                                                             |  |
| 5.2E-06              | 2.10                                                        | 1.53 | 2.89 | 5.1E-08                                    | 2.64                                                                                                 | 1.86 | 3.74 | 1.7E-06                                         | 6.3E-05                                     | 1.8E-05                                                             |  |
| 5.2E-06              | 2.10                                                        | 1.53 | 2.89 | 5.1E-08                                    | 2.64                                                                                                 | 1.86 | 3.74 | 1.7E-06                                         | 6.3E-05                                     | 1.8E-05                                                             |  |
| 9.0E-07              | 2.40                                                        | 1.69 | 3.40 | 3.2E-08                                    | 2.90                                                                                                 | 1.99 | 4.23 | 2.6E-07                                         | 5.1E-05                                     | 1.7E-05                                                             |  |
| 5.3E-06              | 2.10                                                        | 1.53 | 2.89 | 5.4E-08                                    | 2.63                                                                                                 | 1.86 | 3.73 | 1.8E-06                                         | 6.5E-05                                     | 1.9E-05                                                             |  |
| 5.2E-06              | 2.10                                                        | 1.53 | 2.89 | 5.4E-08                                    | 2.63                                                                                                 | 1.86 | 3.73 | 1.8E-06                                         | 6.5E-05                                     | 1.9E-05                                                             |  |
| 5.3E-06              | 2.10                                                        | 1.53 | 2.89 | 5.4E-08                                    | 2.63                                                                                                 | 1.86 | 3.73 | 1.8E-06                                         | 6.5E-05                                     | 1.9E-05                                                             |  |
| 5.2E-06              | 2.10                                                        | 1.53 | 2.89 | 5.4E-08                                    | 2.63                                                                                                 | 1.86 | 3.73 | 1.8E-06                                         | 6.5E-05                                     | 1.9E-05                                                             |  |
| 5.3E-06              | 2.10                                                        | 1.52 | 2.89 | 5.5E-08                                    | 2.63                                                                                                 | 1.86 | 3.73 | 1.8E-06                                         | 6.5E-05                                     | 1.9E-05                                                             |  |
| 5.3E-06              | 2.10                                                        | 1.52 | 2.89 | 5.5E-08                                    | 2.63                                                                                                 | 1.86 | 3.73 | 1.8E-06                                         | 6.5E-05                                     | 1.9E-05                                                             |  |
| 5.3E-06              | 2.10                                                        | 1.52 | 2.89 | 5.5E-08                                    | 2.63                                                                                                 | 1.86 | 3.73 | 1.8E-06                                         | 6.5E-05                                     | 1.9E-05                                                             |  |
| 5.3E-06              | 2.10                                                        | 1.52 | 2.89 | 5.5E-08                                    | 2.63                                                                                                 | 1.86 | 3.73 | 1.8E-06                                         | 6.5E-05                                     | 1.9E-05                                                             |  |
| 5.3E-06              | 2.10                                                        | 1.52 | 2.89 | 5.5E-08                                    | 2.63                                                                                                 | 1.86 | 3.73 | 1.8E-06                                         | 6.5E-05                                     | 1.9E-05                                                             |  |
| 5.3E-06              | 2.10                                                        | 1.53 | 2.89 | 5.5E-08                                    | 2.63                                                                                                 | 1.86 | 3.73 | 1.8E-06                                         | 6.5E-05                                     | 1.9E-05                                                             |  |
| 5.5E-06              | 2.10                                                        | 1.52 | 2.88 | 5.5E-08                                    | 2.63                                                                                                 | 1.86 | 3.72 | 1.9E-06                                         | 6.5E-05                                     | 1.9E-05                                                             |  |
| 9.0E-02              | 1.15                                                        | 0.98 | 1.36 | 4.5E-07                                    | 1.61                                                                                                 | 1.34 | 1.94 | 2.8E-05                                         | 1.7E-03                                     | 1.9E-03                                                             |  |
| 1.6E-01              | 1.12                                                        | 0.96 | 1.32 | 3.8E-07                                    | 1.60                                                                                                 | 1.34 | 1.92 | 6.1E-05                                         | 1.7E-03                                     | 1.5E-03                                                             |  |
| 1.3E-70              | 4.74                                                        | 3.99 | 5.62 | 3.2E-01                                    | 0.87                                                                                                 | 0.67 | 1.14 | 3.4E-16                                         | 3.3E-01                                     | 3.5E-01                                                             |  |
| 1.3E-01              | 1.14                                                        | 0.96 | 1.34 | 3.9E-07                                    | 1.62                                                                                                 | 1.35 | 1.95 | 5.1E-05                                         | 8.9E-04                                     | 1.8E-03                                                             |  |
| 2.2E-70              | 4.50                                                        | 3.81 | 5.32 | 3.0E-01                                    | 0.87                                                                                                 | 0.67 | 1.13 | 2.6E-16                                         | 3.2E-01                                     | 3.2E-01                                                             |  |
| 2.2E-70              | 4.44                                                        | 3.77 | 5.24 | 2.8E-01                                    | 0.86                                                                                                 | 0.67 | 1.12 | 1.8E-16                                         | 2.9E-01                                     | 3.0E-01                                                             |  |
| 1.1E-01              | 1.15                                                        | 0.97 | 1.36 | 1.9E-07                                    | 1.66                                                                                                 | 1.37 | 2.02 | 3.3E-05                                         | 8.3E-04                                     | 1.7E-03                                                             |  |
| 1.5E-73              | 4.54                                                        | 3.85 | 5.34 | 2.4E-01                                    | 0.85                                                                                                 | 0.65 | 1.12 | 7.9E-18                                         | 2.5E-01                                     | 2.6E-01                                                             |  |
| 2.0E-72              | 4.44                                                        | 3.77 | 5.22 | 1.9E-01                                    | 0.84                                                                                                 | 0.64 | 1.09 | 2.0E-17                                         | 1.5E-01                                     | 2.1E-01                                                             |  |
| 6.0E-73              | 4.45                                                        | 3.79 | 5.24 | 2.0E-01                                    | 0.84                                                                                                 | 0.64 | 1.10 | 1.3E-17                                         | 1.6E-01                                     | 2.2E-01                                                             |  |
| 2.0E-75              | 4.43                                                        | 3.78 | 5.19 | 2.6E-01                                    | 0.85                                                                                                 | 0.65 | 1.12 | 3.8E-19                                         | 2.2E-01                                     | 3.0E-01                                                             |  |
| 7.6E-76              | 4.47                                                        | 3.81 | 5.24 | 2.6E-01                                    | 0.85                                                                                                 | 0.65 | 1.13 | 2.3E-19                                         | 2.2E-01                                     | 3.0E-01                                                             |  |
| 6.6E-81              | 4.99                                                        | 4.23 | 5.89 | 1.8E-01                                    | 0.80                                                                                                 | 0.58 | 1.11 | 1.1E-21                                         | 2.0E-01                                     | 1.8E-01                                                             |  |
| 7.6E-81              | 4.95                                                        | 4.20 | 5.83 | 1.9E-01                                    | 0.80                                                                                                 | 0.58 | 1.11 | 9.9E-22                                         | 2.1E-01                                     | 1.8E-01                                                             |  |
| 4.1E-72              | 3.74                                                        | 3.24 | 4.32 | 6.4E-03                                    | 1.36                                                                                                 | 1.09 | 1.70 | 2.5E-24                                         | 1.7E-01                                     | 9.2E-02                                                             |  |
| 2.5E-84              | 5.22                                                        | 4.42 | 6.17 | 1.5E-01                                    | 0.78                                                                                                 | 0.56 | 1.09 | 4.7E-23                                         | 1.6E-01                                     | 1.3E-01                                                             |  |
| 2.1E-75              | 3.84                                                        | 3.33 | 4.44 | 3.7E-03                                    | 1.39                                                                                                 | 1.11 | 1.73 | 1.0E-25                                         | 1.2E-01                                     | 6.3E-02                                                             |  |
| 2.8E-84              | 5.22                                                        | 4.42 | 6.16 | 1.5E-01                                    | 0.78                                                                                                 | 0.56 | 1.09 | 5.0E-23                                         | 1.6E-01                                     | 1.3E-01                                                             |  |
| 2.6E-73              | 3.66                                                        | 3.18 | 4.21 | 4.2E-03                                    | 1.37                                                                                                 | 1.11 | 1.71 | 2.3E-25                                         | 1.3E-01                                     | 6.8E-02                                                             |  |
| 7.6E-85              | 5.20                                                        | 4.40 | 6.13 | 1.7E-01                                    | 0.79                                                                                                 | 0.57 | 1.10 | 4.6E-23                                         | 1.9E-01                                     | 1.6E-01                                                             |  |
| 6.2E-74              | 3.66                                                        | 3.18 | 4.21 | 3.4E-03                                    | 1.38                                                                                                 | 1.11 | 1.71 | 2.2E-25                                         | 1.0E-01                                     | 5.7E-02                                                             |  |
| 5.4E-85              | 5.17                                                        | 4.39 | 6.10 | 2.0E-01                                    | 0.80                                                                                                 | 0.58 | 1.12 | 3.0E-23                                         | 2.2E-01                                     | 1.8E-01                                                             |  |
| 6.2E-83              | 5.10                                                        | 4.32 | 6.02 | 1.1E-01                                    | 0.77                                                                                                 | 0.55 | 1.07 | 2.7E-22                                         | 1.5E-01                                     | 1.0E-01                                                             |  |
| 3.8E-84              | 4.90                                                        | 4.17 | 5.75 | 2.3E-01                                    | 0.82                                                                                                 | 0.60 | 1.13 | 3.0E-23                                         | 2.9E-01                                     | 2.4E-01                                                             |  |
| 9.4E-76              | 3.82                                                        | 3.31 | 4.41 | 1.4E-03                                    | 1.43                                                                                                 | 1.15 | 1.78 | 2.6E-26                                         | 5.4E-02                                     | 2.6E-02                                                             |  |
| 2.9E-73              | 3.75                                                        | 3.25 | 4.33 | 2.7E-03                                    | 1.39                                                                                                 | 1.12 | 1.73 | 3.9E-25                                         | 7.7E-02                                     | 4.6E-02                                                             |  |
| 3.6E-84              | 4.91                                                        | 4.18 | 5.77 | 2.0E-01                                    | 0.81                                                                                                 | 0.58 | 1.12 | 4.0E-23                                         | 2.4E-01                                     | 2.0E-01                                                             |  |
| 2.7E-82              | 5.04                                                        | 4.27 | 5.94 | 1.1E-01                                    | 0.77                                                                                                 | 0.55 | 1.06 | 4.5E-22                                         | 1.6E-01                                     | 9.9E-02                                                             |  |
| 4.8E-84              | 4.90                                                        | 4.18 | 5.76 | 1.9E-01                                    | 0.80                                                                                                 | 0.58 | 1.11 | 5.3E-23                                         | 2.3E-01                                     | 1.9E-01                                                             |  |

|          |      |      |      |                   |                   |                   |                   |         |                   |                   |
|----------|------|------|------|-------------------|-------------------|-------------------|-------------------|---------|-------------------|-------------------|
| 6.2E-74  | 3.72 | 3.23 | 4.29 | 1.5E-02           | 1.31              | 1.05              | 1.64              | 1.0E-23 | 1.1E-01           | 1.8E-01           |
| 3.6E-77  | 4.62 | 3.93 | 5.43 | 1.1E-01           | 0.78              | 0.58              | 1.05              | 3.4E-20 | 2.1E-01           | 9.4E-02           |
| 9.0E-78  | 4.66 | 3.97 | 5.48 | 1.1E-01           | 0.78              | 0.58              | 1.06              | 2.0E-20 | 2.2E-01           | 1.0E-01           |
| 2.2E-70  | 3.54 | 3.08 | 4.07 | 4.4E-03           | 1.36              | 1.10              | 1.67              | 5.7E-24 | 6.4E-02           | 6.6E-02           |
| 8.0E-78  | 4.66 | 3.97 | 5.48 | 1.1E-01           | 0.78              | 0.58              | 1.06              | 1.9E-20 | 2.2E-01           | 1.0E-01           |
| 2.4E-74  | 3.81 | 3.30 | 4.40 | 2.7E-02           | 1.29              | 1.03              | 1.61              | 6.4E-24 | 1.6E-01           | 2.5E-01           |
| 7.6E-78  | 4.66 | 3.97 | 5.48 | 1.1E-01           | 0.78              | 0.58              | 1.06              | 1.9E-20 | 2.2E-01           | 1.0E-01           |
| 1.1E-77  | 4.63 | 3.94 | 5.44 | 7.2E-02           | 0.76              | 0.56              | 1.03              | 3.5E-20 | 1.6E-01           | 7.1E-02           |
| 4.1E-76  | 3.84 | 3.33 | 4.42 | 6.9E-03           | 1.36              | 1.09              | 1.71              | 8.1E-26 | 5.6E-02           | 9.7E-02           |
| 2.8E-77  | 4.56 | 3.89 | 5.35 | 8.9E-02           | 0.77              | 0.57              | 1.04              | 3.4E-20 | 1.8E-01           | 8.6E-02           |
| 3.6E-77  | 4.44 | 3.79 | 5.19 | 1.7E-01           | 0.81              | 0.61              | 1.09              | 1.2E-20 | 3.1E-01           | 1.7E-01           |
| 1.1E-88  | 4.41 | 3.81 | 5.11 | 3.3E-05           | 1.70              | 1.32              | 2.19              | 2.4E-33 | 1.7E-02           | 8.4E-03           |
| 3.7E-93  | 4.67 | 4.03 | 5.41 | 6.4E-05           | 1.74              | 1.33              | 2.28              | 3.3E-35 | 2.2E-02           | 1.7E-02           |
| 6.5E-01  | 1.04 | 0.88 | 1.22 | 2.6E-07           | 1.63              | 1.36              | 1.97              | 1.5E-03 | 1.9E-01           | 2.7E-02           |
| 7.7E-105 | 5.90 | 5.03 | 6.93 | 2.7E-01           | 1.35              | 0.79              | 2.29              | 1.6E-38 | 2.2E-01           | 2.8E-01           |
| 1.5E-94  | 4.63 | 4.00 | 5.36 | 9.2E-05           | 1.79              | 1.34              | 2.41              | 1.1E-36 | 1.5E-03           | 6.2E-05           |
| 2.8E-73  | 3.95 | 3.40 | 4.58 | 1.5E-01           | 0.80              | 0.59              | 1.08              | 8.4E-20 | 6.9E-01           | 1.2E-01           |
| 1.6E-106 | 5.90 | 5.03 | 6.91 | 1.2E-01           | 1.56              | 0.90              | 2.72              | 5.1E-41 | 6.8E-02           | 1.2E-01           |
| 6.8E-03  | 0.83 | 0.72 | 0.95 | 2.7E-07           | 1.54              | 1.31              | 1.82              | 6.2E-02 | 5.0E-03           | 1.2E-02           |
| 4.3E-01  | 0.94 | 0.82 | 1.09 | 1.2E-10           | 1.75              | 1.48              | 2.08              | 6.6E-04 | 2.5E-03           | 7.7E-05           |
| 2.2E-35  | 0.44 | 0.39 | 0.50 | 5.0E-07           | 0.66              | 0.56              | 0.77              | 7.5E-18 | 6.1E-05           | 1.5E-02           |
| 1.1E-43  | 0.41 | 0.36 | 0.46 | 3.5E-07           | 0.65              | 0.55              | 0.77              | 5.7E-21 | 8.9E-04           | 1.3E-02           |
| 6.5E-44  | 0.41 | 0.36 | 0.46 | 3.1E-07           | 0.65              | 0.55              | 0.76              | 4.3E-21 | 8.5E-04           | 1.3E-02           |
| 4.2E-108 | 6.02 | 5.13 | 7.06 | 2.7E-01           | 1.40              | 0.77              | 2.54              | 6.7E-41 | 1.7E-01           | 2.5E-01           |
| 2.2E-43  | 0.42 | 0.37 | 0.47 | 3.7E-07           | 0.66              | 0.56              | 0.77              | 4.3E-21 | 4.6E-04           | 1.2E-02           |
| 1.1E-02  | 0.84 | 0.73 | 0.96 | 3.1E-07           | 1.53              | 1.30              | 1.81              | 8.4E-02 | 4.7E-02           | 1.1E-02           |
| 1.8E-53  | 0.38 | 0.33 | 0.43 | 3.0E-10           | 0.59              | 0.51              | 0.70              | 1.5E-27 | 4.6E-04           | 7.9E-05           |
| 2.3E-01  | 0.91 | 0.79 | 1.06 | 7.1E-08           | 1.62              | 1.36              | 1.94              | 1.2E-02 | 4.8E-02           | 2.7E-02           |
| 3.0E-06  | 0.73 | 0.64 | 0.83 | 3.1E-07           | 1.54              | 1.31              | 1.82              | 8.2E-01 | 8.3E-03           | 1.1E-02           |
| 3.9E-01  | 0.94 | 0.81 | 1.09 | 7.5E-09           | 1.70              | 1.42              | 2.03              | 3.7E-03 | 1.3E-02           | 9.4E-03           |
| 2.2E-01  | 0.91 | 0.78 | 1.06 | 5.0E-08           | 1.66              | 1.38              | 2.00              | 1.1E-02 | 4.8E-02           | 2.7E-02           |
| 2.2E-01  | 0.91 | 0.78 | 1.06 | 5.3E-08           | 1.66              | 1.38              | 1.99              | 1.2E-02 | 5.0E-02           | 2.8E-02           |
| 2.5E-01  | 0.92 | 0.79 | 1.06 | 6.0E-08           | 1.63              | 1.36              | 1.94              | 1.1E-02 | 4.6E-02           | 2.6E-02           |
| 3.1E-01  | 0.92 | 0.79 | 1.08 | 7.8E-09           | 1.71              | 1.43              | 2.06              | 4.7E-03 | 1.5E-02           | 1.0E-02           |
| 3.1E-03  | 1.59 | 1.17 | 2.17 | 3.4E-07           | 2.43              | 1.73              | 3.41              | 1.8E-05 | 1.7E-05           | 1.2E-07           |
| 3.7E-03  | 1.63 | 1.17 | 2.28 | 1.9E-07           | 2.69              | 1.85              | 3.91              | 1.5E-05 | 1.6E-05           | 7.3E-08           |
| 3.1E-11  | 1.55 | 1.36 | 1.76 | 4.3E-07           | 0.65              | 0.55              | 0.77              | 7.2E-01 | 2.8E-04           | 2.9E-02           |
| 3.6E-03  | 1.64 | 1.18 | 2.28 | 2.0E-07           | 2.69              | 1.85              | 3.90              | 1.5E-05 | 1.6E-05           | 7.6E-08           |
| 1.7E-74  | 3.97 | 3.43 | 4.61 | 8.1E-01           | 0.96              | 0.71              | 1.31              | 1.6E-23 | 4.1E-01           | 9.9E-01           |
| 1.7E-74  | 3.98 | 3.43 | 4.61 | 8.1E-01           | 0.96              | 0.71              | 1.31              | 1.7E-23 | 4.1E-01           | 9.9E-01           |
| 4.1E-87  | 4.61 | 3.96 | 5.37 | 5.1E-01           | 0.88              | 0.60              | 1.29              | 1.6E-28 | 4.8E-01           | 4.5E-01           |
| 5.2E-112 | 6.75 | 5.71 | 7.97 | 7.4E-01           | 0.75              | 0.14              | 4.00              | 5.6E-44 | 7.5E-01           | 8.0E-01           |
| 2.7E-03  | 1.49 | 1.15 | 1.94 | 9.9E-09           | 2.36              | 1.76              | 3.17              | 2.5E-05 | 1.0E+00           | 1.0E+00           |
| 2.7E-03  | 1.49 | 1.15 | 1.94 | 1.0E-08           | 2.36              | 1.76              | 3.17              | 2.5E-05 | 1.0E+00           | 1.0E+00           |
| 6.1E-106 | 5.85 | 4.99 | 6.85 | 5.7E-01           | 0.78              | 0.33              | 1.85              | 6.2E-40 | 9.0E-01           | 5.3E-01           |
| 2.9E-113 | 6.41 | 5.46 | 7.53 | COND <sup>i</sup> | COND <sup>i</sup> | COND <sup>i</sup> | COND <sup>i</sup> | 4.7E-45 | COND <sup>i</sup> | COND <sup>i</sup> |
| 6.1E-03  | 1.38 | 1.10 | 1.74 | 2.3E-08           | 2.09              | 1.61              | 2.70              | 8.9E-05 | COND <sup>i</sup> | 5.0E-01           |
| 2.7E-03  | 1.49 | 1.15 | 1.94 | 1.0E-08           | 2.36              | 1.76              | 3.17              | 2.5E-05 | COND <sup>i</sup> | COND <sup>i</sup> |
| 1.1E-107 | 6.02 | 5.13 | 7.06 | 3.2E-01           | 0.57              | 0.19              | 1.71              | 5.7E-41 | 2.2E-01           | 3.0E-01           |
| 2.9E-106 | 5.89 | 5.03 | 6.91 | 6.3E-01           | 0.81              | 0.34              | 1.93              | 3.9E-40 | 9.4E-01           | 5.9E-01           |
| 2.3E-03  | 1.50 | 1.16 | 1.95 | 1.0E-08           | 2.36              | 1.76              | 3.16              | 2.4E-05 | 9.5E-01           | 9.6E-01           |
| 2.3E-03  | 1.50 | 1.16 | 1.95 | 1.0E-08           | 2.36              | 1.76              | 3.16              | 2.4E-05 | 9.5E-01           | 9.6E-01           |
| 2.4E-03  | 1.50 | 1.15 | 1.95 | 1.0E-08           | 2.36              | 1.76              | 3.16              | 2.4E-05 | 9.6E-01           | 9.6E-01           |
| 2.9E-63  | 2.91 | 2.57 | 3.30 | 1.0E-10           | 1.76              | 1.48              | 2.09              | 1.5E-29 | 5.6E-01           | 6.0E-04           |

|          |      |      |      |         |      |      |      |         |         |         |
|----------|------|------|------|---------|------|------|------|---------|---------|---------|
| 2.9E-63  | 2.91 | 2.57 | 3.30 | 1.0E-10 | 1.76 | 1.48 | 2.09 | 1.5E-29 | 5.6E-01 | 6.0E-04 |
| 2.7E-03  | 1.49 | 1.15 | 1.94 | 1.0E-08 | 2.36 | 1.76 | 3.16 | 2.6E-05 | 9.7E-01 | 9.8E-01 |
| 6.7E-84  | 4.40 | 3.79 | 5.11 | 4.3E-01 | 0.87 | 0.60 | 1.24 | 5.6E-27 | 8.9E-01 | 3.9E-01 |
| 2.0E-02  | 1.35 | 1.05 | 1.73 | 1.3E-07 | 2.15 | 1.62 | 2.86 | 5.4E-04 | 2.7E-01 | 3.0E-01 |
| 2.7E-92  | 4.47 | 3.87 | 5.16 | 4.2E-03 | 1.56 | 1.15 | 2.11 | 1.4E-34 | 8.1E-02 | 4.4E-03 |
| 8.5E-86  | 3.77 | 3.30 | 4.31 | 1.0E-07 | 1.86 | 1.48 | 2.33 | 1.1E-35 | 6.6E-02 | 3.7E-01 |
| 8.4E-109 | 5.90 | 5.04 | 6.90 | 1.5E-01 | 1.59 | 0.85 | 2.95 | 2.5E-41 | 9.4E-03 | 2.0E-01 |
| 8.6E-97  | 5.51 | 4.69 | 6.47 | 8.8E-01 | 1.03 | 0.69 | 1.55 | 1.1E-29 | 6.9E-01 | 7.4E-01 |
| 7.5E-100 | 5.80 | 4.93 | 6.83 | 8.8E-01 | 1.03 | 0.68 | 1.56 | 1.9E-31 | 6.9E-01 | 7.5E-01 |
| 7.8E-72  | 3.73 | 3.23 | 4.31 | 4.2E-03 | 1.37 | 1.10 | 1.70 | 4.0E-15 | 3.6E-02 | 1.5E-01 |
| 4.9E-76  | 4.12 | 3.54 | 4.79 | 5.8E-03 | 1.38 | 1.10 | 1.73 | 5.2E-15 | 4.7E-02 | 1.9E-01 |
| 8.2E-74  | 4.07 | 3.50 | 4.74 | 6.7E-03 | 1.36 | 1.09 | 1.71 | 6.2E-14 | 4.7E-02 | 2.0E-01 |
| 3.9E-78  | 4.17 | 3.59 | 4.84 | 2.4E-03 | 1.42 | 1.13 | 1.79 | 3.2E-16 | 2.9E-02 | 1.1E-01 |
| 5.2E-76  | 4.02 | 3.47 | 4.66 | 3.4E-03 | 1.40 | 1.12 | 1.75 | 1.9E-15 | 3.0E-02 | 1.4E-01 |
| 3.1E-74  | 4.02 | 3.46 | 4.67 | 4.9E-03 | 1.38 | 1.10 | 1.72 | 1.9E-14 | 3.5E-02 | 1.7E-01 |
| 3.5E-74  | 3.84 | 3.32 | 4.44 | 2.7E-03 | 1.40 | 1.12 | 1.74 | 3.0E-15 | 2.1E-02 | 1.1E-01 |
| 9.2E-74  | 3.83 | 3.31 | 4.42 | 3.3E-03 | 1.39 | 1.12 | 1.73 | 4.8E-15 | 2.5E-02 | 1.3E-01 |
| 1.7E-75  | 3.98 | 3.43 | 4.61 | 2.3E-03 | 1.42 | 1.13 | 1.77 | 1.5E-15 | 2.6E-02 | 1.2E-01 |
| 1.0E-73  | 4.01 | 3.45 | 4.66 | 9.7E-03 | 1.34 | 1.07 | 1.68 | 7.6E-14 | 6.0E-02 | 2.4E-01 |
| 9.0E-75  | 3.99 | 3.44 | 4.62 | 3.1E-03 | 1.40 | 1.12 | 1.75 | 5.7E-15 | 2.4E-02 | 1.3E-01 |
| 1.4E-78  | 4.19 | 3.61 | 4.87 | 1.4E-03 | 1.45 | 1.15 | 1.82 | 1.6E-16 | 1.7E-02 | 7.8E-02 |
| 9.8E-99  | 6.54 | 5.49 | 7.78 | 1.2E-01 | 1.30 | 0.93 | 1.81 | 8.3E-25 | 8.5E-02 | 1.2E-01 |
| 9.5E-99  | 6.45 | 5.43 | 7.68 | 9.1E-02 | 1.33 | 0.96 | 1.85 | 4.2E-25 | 9.3E-02 | 1.0E-01 |
| 8.8E-75  | 3.93 | 3.39 | 4.55 | 3.3E-03 | 1.39 | 1.12 | 1.74 | 3.8E-15 | 2.6E-02 | 1.3E-01 |
| 4.0E-74  | 3.84 | 3.32 | 4.43 | 3.0E-03 | 1.39 | 1.12 | 1.73 | 3.7E-15 | 2.4E-02 | 1.2E-01 |
| 8.0E-99  | 6.48 | 5.45 | 7.71 | 1.1E-01 | 1.31 | 0.94 | 1.83 | 7.1E-25 | 1.1E-01 | 1.1E-01 |
| 7.8E-96  | 5.88 | 4.97 | 6.94 | 7.8E-02 | 1.33 | 0.97 | 1.83 | 1.4E-24 | 7.0E-02 | 7.4E-02 |
| 4.0E-97  | 6.09 | 5.14 | 7.22 | 7.5E-02 | 1.34 | 0.97 | 1.84 | 9.0E-25 | 6.2E-02 | 7.1E-02 |
| 4.4E-97  | 6.08 | 5.13 | 7.20 | 7.2E-02 | 1.34 | 0.97 | 1.85 | 8.1E-25 | 5.9E-02 | 6.7E-02 |
| 1.1E-94  | 5.81 | 4.92 | 6.87 | 7.8E-02 | 1.33 | 0.97 | 1.82 | 3.3E-24 | 7.1E-02 | 7.3E-02 |
| 4.2E-97  | 6.07 | 5.13 | 7.19 | 6.7E-02 | 1.35 | 0.98 | 1.85 | 7.0E-25 | 5.6E-02 | 6.3E-02 |
| 6.3E-98  | 6.21 | 5.23 | 7.36 | 5.0E-02 | 1.37 | 1.00 | 1.89 | 4.0E-25 | 4.2E-02 | 4.7E-02 |
| 7.4E-96  | 5.92 | 5.01 | 7.00 | 7.0E-02 | 1.34 | 0.98 | 1.85 | 2.4E-24 | 6.5E-02 | 6.8E-02 |
| 4.3E-96  | 5.94 | 5.02 | 7.03 | 6.2E-02 | 1.35 | 0.98 | 1.86 | 1.6E-24 | 6.0E-02 | 6.0E-02 |
| 2.8E-96  | 5.95 | 5.03 | 7.04 | 4.8E-02 | 1.38 | 1.00 | 1.89 | 1.1E-24 | 5.2E-02 | 4.7E-02 |
| 3.4E-94  | 5.76 | 4.87 | 6.80 | 9.2E-02 | 1.31 | 0.96 | 1.78 | 8.5E-23 | 8.9E-02 | 8.4E-02 |
| 6.4E-92  | 5.69 | 4.82 | 6.73 | 1.3E-01 | 1.27 | 0.93 | 1.72 | 2.6E-20 | 1.3E-01 | 1.2E-01 |
| 9.0E-90  | 6.17 | 5.16 | 7.36 | 6.0E-01 | 1.09 | 0.80 | 1.48 | 1.4E-15 | 5.8E-01 | 5.7E-01 |
| 1.4E-88  | 5.54 | 4.69 | 6.56 | 2.3E-01 | 1.20 | 0.89 | 1.62 | 1.3E-17 | 2.5E-01 | 2.2E-01 |
| 1.5E-88  | 5.55 | 4.69 | 6.56 | 1.6E-01 | 1.23 | 0.92 | 1.65 | 2.4E-17 | 2.2E-01 | 1.8E-01 |
| 5.3E-90  | 5.67 | 4.79 | 6.71 | 9.6E-02 | 1.28 | 0.96 | 1.72 | 4.7E-18 | 1.2E-01 | 1.0E-01 |
| 1.3E-82  | 5.25 | 4.44 | 6.22 | 1.4E-01 | 1.22 | 0.94 | 1.60 | 1.0E-10 | 2.3E-01 | 1.8E-01 |
| 3.9E-82  | 5.25 | 4.43 | 6.22 | 1.5E-01 | 1.22 | 0.93 | 1.59 | 2.0E-10 | 2.4E-01 | 1.9E-01 |
| 1.3E-76  | 4.78 | 4.05 | 5.64 | 1.1E-01 | 1.23 | 0.96 | 1.58 | 7.9E-08 | 1.5E-01 | 1.3E-01 |
| 6.9E-75  | 4.02 | 3.46 | 4.67 | 9.8E-06 | 1.60 | 1.30 | 1.97 | 2.4E-14 | 5.7E-03 | 1.8E-03 |
| 2.4E-76  | 4.00 | 3.45 | 4.63 | 6.8E-06 | 1.60 | 1.30 | 1.97 | 1.4E-14 | 5.7E-03 | 1.4E-03 |
| 1.6E-79  | 4.29 | 3.69 | 4.99 | 4.3E-06 | 1.64 | 1.33 | 2.02 | 1.6E-14 | 5.1E-03 | 1.2E-03 |
| 9.6E-70  | 3.50 | 3.05 | 4.03 | 1.3E-08 | 1.72 | 1.43 | 2.07 | 4.7E-16 | 1.7E-05 | 2.5E-06 |
| 1.1E-16  | 0.41 | 0.34 | 0.51 | 2.4E-08 | 0.50 | 0.39 | 0.64 | 5.3E-09 | 1.9E-07 | 1.4E-08 |
| 3.7E-16  | 0.42 | 0.34 | 0.52 | 3.2E-08 | 0.51 | 0.40 | 0.64 | 6.1E-09 | 2.1E-07 | 1.6E-08 |
| 1.2E-73  | 4.69 | 3.97 | 5.54 | 2.1E-01 | 1.17 | 0.91 | 1.50 | 9.4E-01 | 3.6E-01 | 2.9E-01 |
| 1.2E-73  | 4.69 | 3.97 | 5.54 | 2.0E-01 | 1.17 | 0.92 | 1.50 | 9.9E-01 | 3.4E-01 | 2.8E-01 |
| 3.7E-16  | 0.42 | 0.34 | 0.52 | 3.2E-08 | 0.51 | 0.40 | 0.64 | 6.1E-09 | 2.1E-07 | 1.6E-08 |
| 1.2E-73  | 4.69 | 3.97 | 5.54 | 2.0E-01 | 1.17 | 0.92 | 1.50 | 9.9E-01 | 3.4E-01 | 2.8E-01 |
| 2.3E-03  | 1.77 | 1.22 | 2.55 | 1.4E-07 | 3.11 | 2.04 | 4.75 | 3.1E-06 | 5.9E-08 | 6.0E-09 |

|         |      |      |      |         |      |      |       |                   |         |         |
|---------|------|------|------|---------|------|------|-------|-------------------|---------|---------|
| 3.7E-16 | 0.42 | 0.34 | 0.52 | 3.2E-08 | 0.51 | 0.40 | 0.64  | 6.1E-09           | 2.1E-07 | 1.6E-08 |
| 9.7E-74 | 4.70 | 3.98 | 5.56 | 2.0E-01 | 1.18 | 0.92 | 1.50  | COND <sup>i</sup> | 3.3E-01 | 2.7E-01 |
| 3.7E-16 | 0.42 | 0.34 | 0.52 | 3.2E-08 | 0.51 | 0.40 | 0.64  | 6.1E-09           | 2.1E-07 | 1.6E-08 |
| 2.1E-08 | 4.91 | 2.81 | 8.56 | 1.3E-11 | 8.33 | 4.51 | 15.39 | 3.8E-10           | 3.7E-10 | 9.1E-12 |
| 3.7E-16 | 0.42 | 0.34 | 0.52 | 3.2E-08 | 0.51 | 0.40 | 0.64  | 6.1E-09           | 2.1E-07 | 1.6E-08 |
| 6.0E-71 | 4.37 | 3.72 | 5.14 | 1.1E-01 | 1.21 | 0.96 | 1.53  | 1.5E-01           | 2.5E-01 | 1.8E-01 |
| 3.7E-16 | 0.42 | 0.34 | 0.52 | 3.2E-08 | 0.51 | 0.40 | 0.64  | 6.1E-09           | 2.1E-07 | 1.6E-08 |
| 3.7E-16 | 0.42 | 0.34 | 0.52 | 3.2E-08 | 0.51 | 0.40 | 0.64  | 6.1E-09           | 2.1E-07 | 1.6E-08 |
| 3.7E-16 | 0.42 | 0.34 | 0.52 | 3.2E-08 | 0.51 | 0.40 | 0.64  | 6.1E-09           | 2.1E-07 | 1.6E-08 |
| 3.7E-16 | 0.42 | 0.34 | 0.52 | 3.2E-08 | 0.51 | 0.40 | 0.64  | 6.1E-09           | 2.1E-07 | 1.6E-08 |
| 3.7E-16 | 0.42 | 0.34 | 0.52 | 3.2E-08 | 0.51 | 0.40 | 0.64  | 6.1E-09           | 2.1E-07 | 1.6E-08 |
| 3.2E-16 | 0.42 | 0.35 | 0.52 | 3.0E-08 | 0.51 | 0.40 | 0.65  | 5.7E-09           | 2.4E-07 | 1.7E-08 |
| 2.2E-19 | 0.46 | 0.39 | 0.55 | 1.0E-08 | 0.57 | 0.47 | 0.69  | 2.0E-08           | 4.4E-08 | 9.8E-09 |
| 3.2E-16 | 0.42 | 0.35 | 0.52 | 3.0E-08 | 0.51 | 0.40 | 0.65  | 5.7E-09           | 2.4E-07 | 1.7E-08 |
| 3.2E-16 | 0.42 | 0.35 | 0.52 | 3.0E-08 | 0.51 | 0.40 | 0.65  | 5.7E-09           | 2.4E-07 | 1.7E-08 |
| 3.2E-16 | 0.42 | 0.35 | 0.52 | 3.0E-08 | 0.51 | 0.40 | 0.65  | 5.7E-09           | 2.4E-07 | 1.7E-08 |
| 3.2E-16 | 0.42 | 0.35 | 0.52 | 3.0E-08 | 0.51 | 0.40 | 0.65  | 5.7E-09           | 2.4E-07 | 1.7E-08 |
| 3.4E-07 | 4.01 | 2.35 | 6.84 | 6.6E-11 | 7.33 | 4.03 | 13.33 | 4.0E-09           | 2.0E-09 | 3.9E-11 |
| 3.4E-07 | 4.01 | 2.35 | 6.84 | 6.6E-11 | 7.33 | 4.03 | 13.33 | 4.0E-09           | 2.0E-09 | 3.9E-11 |
| 3.4E-07 | 4.01 | 2.35 | 6.84 | 6.6E-11 | 7.33 | 4.03 | 13.33 | 4.0E-09           | 2.0E-09 | 3.9E-11 |
| 4.9E-05 | 1.89 | 1.39 | 2.56 | 1.2E-07 | 2.49 | 1.77 | 3.49  | 9.1E-09           | 9.9E-04 | 7.0E-04 |
| 1.1E-01 | 1.14 | 0.97 | 1.34 | 1.0E-08 | 1.70 | 1.42 | 2.03  | 2.0E-09           | 4.4E-07 | 5.7E-07 |
| 1.0E-01 | 1.14 | 0.97 | 1.34 | 1.0E-08 | 1.70 | 1.42 | 2.03  | 2.1E-09           | 4.4E-07 | 5.7E-07 |
| 7.8E-07 | 3.70 | 2.20 | 6.23 | 3.5E-10 | 6.36 | 3.57 | 11.33 | 1.6E-08           | 8.6E-09 | 2.8E-10 |
| 7.8E-07 | 3.70 | 2.20 | 6.23 | 3.5E-10 | 6.36 | 3.57 | 11.33 | 1.6E-08           | 8.6E-09 | 2.8E-10 |
| 4.7E-03 | 1.20 | 1.06 | 1.37 | 4.0E-07 | 1.43 | 1.25 | 1.64  | 1.5E-07           | 1.4E-05 | 4.6E-06 |
| 4.0E-03 | 1.21 | 1.06 | 1.37 | 4.1E-07 | 1.43 | 1.24 | 1.64  | 1.4E-07           | 1.5E-05 | 4.7E-06 |

A determinants. Most of the data is after conditioning on HLA-B\*08 with or without additional conditioning on HLA B\*08 showed that most of the MHC signal is due to HLA B\*08. Results include both identification information scores >0.9 (see Supplementary Methods). The p values were determined using significant 100 markers prior to conditioning on HLA B\*08 and all markers with  $p < 5E-07$  after conditioning

For sequences designated with amino acid (AA) numbers the symbol refers to the standard Amino Acid (AA) positions. The AA position includes the leader sequence (e.g. DRB1\* position 104 is the same as DRB1\* position 104 in the reference sequence). The AA position (SPEC) is compared with all alternative alleles.

of the genotypes. Posterior probabilities of genotyped markers are 1.0.

SNP allele frequency determined by the SNPTTEST v2 algorithm (see methods). SNPs with 1.0

conditioned genes/markers the p values and odds ratios were 1.0.



| Cond. p-value HLA B*08 | Cond. p-value All HLA B A*3101 | Cond. p-value Selected HLA B A*3101 | Cond. p-value HLA B*08 | Cond. p-value HLA B*0801 |
|------------------------|--------------------------------|-------------------------------------|------------------------|--------------------------|
| C*0304                 | DRB1*07                        | A*3101                              | rs1265109 <sup>g</sup> | DRB1*07                  |
| C*0501                 | DRB1*16 <sup>g</sup>           | DRB1*07                             |                        | DRB1*16                  |
| C*1203 <sup>g</sup>    |                                | DRB1*16 <sup>g</sup>                |                        | A3101                    |
| 1.4E-06                | 4.4E-01                        | 3.4E-01                             | 3.6E-06                | 2.7E-01                  |
| 2.1E-06                | 7.4E-01                        | 5.1E-01                             | 4.7E-06                | 3.1E-01                  |
| 1.4E-06                | 4.3E-01                        | 3.3E-01                             | 3.6E-06                | 2.7E-01                  |
| 1.4E-06                | 4.4E-01                        | 3.3E-01                             | 3.6E-06                | 2.7E-01                  |
| 2.3E-06                | 8.1E-01                        | 5.5E-01                             | 5.5E-06                | 3.6E-01                  |
| 2.3E-06                | 8.1E-01                        | 5.5E-01                             | 5.5E-06                | 3.6E-01                  |
| 3.4E-06                | 1.0E+00                        | 1.0E+00                             | 7.5E-06                | 1.0E+00                  |
| 2.5E-06                | 8.2E-01                        | 5.7E-01                             | 5.9E-06                | 3.8E-01                  |
| 2.5E-06                | 8.2E-01                        | 5.7E-01                             | 5.8E-06                | 3.8E-01                  |
| 2.5E-06                | 8.2E-01                        | 5.7E-01                             | 5.9E-06                | 3.8E-01                  |
| 2.5E-06                | 8.2E-01                        | 5.7E-01                             | 5.9E-06                | 3.8E-01                  |
| 2.5E-06                | 8.2E-01                        | 5.7E-01                             | 5.9E-06                | 3.8E-01                  |
| 2.5E-06                | 8.2E-01                        | 5.7E-01                             | 5.9E-06                | 3.8E-01                  |
| 2.5E-06                | 8.2E-01                        | 5.7E-01                             | 5.9E-06                | 3.8E-01                  |
| 2.5E-06                | 8.2E-01                        | 5.7E-01                             | 5.9E-06                | 3.8E-01                  |
| 2.5E-06                | 8.2E-01                        | 5.7E-01                             | 5.9E-06                | 3.8E-01                  |
| 2.5E-06                | 8.2E-01                        | 5.7E-01                             | 6.0E-06                | 3.9E-01                  |
| 3.0E-04                | 6.5E-03                        | 1.7E-02                             | 1.9E-04                | 4.3E-03                  |
| 2.2E-04                | 5.9E-03                        | 1.5E-02                             | 1.5E-04                | 3.7E-03                  |
| 3.6E-01                | 3.5E-01                        | 4.4E-01                             | 4.3E-01                | 5.2E-01                  |
| 3.6E-04                | 3.2E-03                        | 1.3E-02                             | 2.7E-04                | 4.5E-03                  |
| 3.4E-01                | 3.4E-01                        | 4.3E-01                             | 4.1E-01                | 5.2E-01                  |
| 3.2E-01                | 3.1E-01                        | 4.0E-01                             | 3.8E-01                | 5.0E-01                  |
| 2.6E-04                | 1.7E-03                        | 7.8E-03                             | 2.0E-04                | 2.3E-03                  |
| 3.1E-01                | 2.2E-01                        | 3.1E-01                             | 3.4E-01                | 4.0E-01                  |
| 2.6E-01                | 1.9E-01                        | 2.9E-01                             | 3.2E-01                | 4.0E-01                  |
| 2.7E-01                | 2.0E-01                        | 3.0E-01                             | 3.3E-01                | 4.1E-01                  |
| 3.8E-01                | 2.4E-01                        | 3.8E-01                             | 4.8E-01                | 5.7E-01                  |
| 3.8E-01                | 2.5E-01                        | 3.8E-01                             | 4.8E-01                | 5.8E-01                  |
| 2.7E-01                | 1.7E-01                        | 2.3E-01                             | 3.6E-01                | 4.2E-01                  |
| 2.8E-01                | 1.8E-01                        | 2.3E-01                             | 3.8E-01                | 4.3E-01                  |
| 4.1E-01                | 1.7E-01                        | 1.4E-01                             | 6.5E-02                | 1.2E-01                  |
| 1.9E-01                | 1.1E-01                        | 1.4E-01                             | 2.6E-01                | 2.7E-01                  |
| 3.7E-01                | 1.7E-01                        | 1.3E-01                             | 5.3E-02                | 1.3E-01                  |
| 1.8E-01                | 1.1E-01                        | 1.4E-01                             | 2.6E-01                | 2.7E-01                  |
| 3.7E-01                | 1.6E-01                        | 1.3E-01                             | 5.6E-02                | 1.2E-01                  |
| 2.2E-01                | 1.3E-01                        | 1.7E-01                             | 3.0E-01                | 3.0E-01                  |
| 3.3E-01                | 1.3E-01                        | 1.1E-01                             | 4.8E-02                | 1.1E-01                  |
| 2.6E-01                | 1.6E-01                        | 2.0E-01                             | 3.5E-01                | 3.6E-01                  |
| 1.6E-01                | 9.8E-02                        | 1.2E-01                             | 2.4E-01                | 2.6E-01                  |
| 3.3E-01                | 2.0E-01                        | 2.3E-01                             | 4.1E-01                | 4.0E-01                  |
| 1.7E-01                | 8.3E-02                        | 5.7E-02                             | 1.8E-02                | 4.7E-02                  |
| 2.4E-01                | 7.7E-02                        | 5.8E-02                             | 3.1E-02                | 4.8E-02                  |
| 2.8E-01                | 1.6E-01                        | 2.0E-01                             | 3.7E-01                | 3.6E-01                  |
| 1.6E-01                | 1.0E-01                        | 1.4E-01                             | 2.4E-01                | 2.8E-01                  |
| 2.7E-01                | 1.5E-01                        | 1.9E-01                             | 3.5E-01                | 3.5E-01                  |

|                   |                   |                   |                   |                   |
|-------------------|-------------------|-------------------|-------------------|-------------------|
| 4.0E-01           | 1.5E-01           | 1.6E-01           | 9.6E-02           | 1.2E-01           |
| 1.8E-01           | 1.5E-01           | 2.3E-01           | 2.8E-01           | 4.8E-01           |
| 1.9E-01           | 1.5E-01           | 2.4E-01           | 2.9E-01           | 4.8E-01           |
| 2.4E-01           | 9.5E-02           | 5.8E-02           | 2.8E-02           | 3.2E-02           |
| 1.9E-01           | 1.5E-01           | 2.4E-01           | 2.9E-01           | 4.8E-01           |
| 5.6E-01           | 2.3E-01           | 2.2E-01           | 1.6E-01           | 1.9E-01           |
| 1.9E-01           | 1.5E-01           | 2.4E-01           | 2.9E-01           | 4.8E-01           |
| 1.4E-01           | 1.2E-01           | 1.9E-01           | 2.1E-01           | 4.0E-01           |
| 4.1E-01           | 7.4E-02           | 7.6E-02           | 6.5E-02           | 6.8E-02           |
| 1.7E-01           | 1.5E-01           | 2.3E-01           | 2.4E-01           | 4.6E-01           |
| 2.9E-01           | 2.3E-01           | 3.5E-01           | 4.0E-01           | 6.3E-01           |
| 5.0E-02           | 3.7E-02           | 1.5E-02           | 1.2E-03           | 3.6E-03           |
| 1.8E-01           | 3.6E-02           | 3.4E-02           | 4.8E-03           | 1.5E-02           |
| 2.5E-01           | 3.5E-01           | 1.6E-01           | 4.5E-03           | 5.9E-02           |
| 2.2E-01           | 4.5E-01           | 3.7E-01           | 1.5E-01           | 2.3E-01           |
| 5.4E-01           | 1.8E-02           | 4.7E-03           | 7.1E-03           | 6.5E-02           |
| 4.2E-01           | 7.6E-01           | 7.1E-01           | 6.3E-01           | 5.0E-01           |
| 8.3E-02           | 1.7E-01           | 1.4E-01           | 4.4E-02           | 6.0E-02           |
| 3.2E-01           | 4.1E-03           | 2.0E-03           | 1.4E-01           | 8.8E-01           |
| 1.9E-02           | 3.3E-03           | 3.2E-04           | COND              | COND              |
| 1.1E-01           | 6.5E-05           | 8.4E-04           | 2.6E-01           | 9.8E-03           |
| 1.6E-01           | 6.3E-04           | 3.8E-04           | 8.9E-01           | 4.0E-02           |
| 1.6E-01           | 6.0E-04           | 3.6E-04           | 8.8E-01           | 3.8E-02           |
| 1.8E-01           | 2.6E-01           | 1.8E-01           | 1.2E-01           | 8.9E-02           |
| 1.7E-01           | 3.4E-04           | 1.6E-04           | 8.3E-01           | 2.1E-02           |
| 3.2E-01           | 2.5E-01           | 2.5E-01           | 6.2E-01           | 3.3E-01           |
| 1.0E-02           | 2.4E-03           | 2.3E-03           | 1.9E-02           | 1.3E-01           |
| 8.7E-01           | 8.6E-02           | 7.7E-02           | 3.8E-02           | 8.9E-02           |
| 1.2E-01           | 3.4E-02           | 2.1E-01           | 1.7E-01           | 7.4E-01           |
| 4.5E-01           | 2.5E-02           | 2.8E-02           | 1.4E-02           | 3.5E-02           |
| 8.8E-01           | 8.9E-02           | 8.6E-02           | 4.1E-02           | 1.0E-01           |
| 9.0E-01           | 9.2E-02           | 8.8E-02           | 4.2E-02           | 1.1E-01           |
| 8.4E-01           | 8.3E-02           | 7.4E-02           | 3.6E-02           | 8.5E-02           |
| 5.0E-01           | 3.0E-02           | 3.3E-02           | 1.7E-02           | 4.2E-02           |
| 2.6E-01           | 3.5E-04           | 8.3E-05           | 5.3E-04           | 1.1E-02           |
| COND              | 3.3E-04           | 6.7E-05           | 1.5E-03           | 2.4E-02           |
| 1.0E-01           | 3.0E-04           | 2.4E-02           | 2.4E-03           | 7.6E-04           |
| 9.5E-01           | 3.3E-04           | 6.8E-05           | 1.5E-03           | 2.4E-02           |
| 6.4E-01           | 1.8E-01           | 3.5E-01           | 9.6E-01           | 3.8E-01           |
| 6.5E-01           | 1.8E-01           | 3.5E-01           | 9.6E-01           | 3.8E-01           |
| 7.4E-01           | 3.8E-01           | 2.6E-01           | 8.1E-01           | 8.5E-01           |
| 7.0E-01           | 8.4E-01           | 9.0E-01           | 9.0E-01           | 7.9E-01           |
| 2.0E-03           | 1.0E+00           | 1.0E+00           | 2.7E-03           | 3.9E-02           |
| 2.0E-03           | 1.0E+00           | 1.0E+00           | 2.7E-03           | 3.9E-02           |
| 6.4E-01           | 9.0E-01           | 7.7E-01           | 4.3E-01           | 7.5E-01           |
| COND <sup>i</sup> |
| 1.6E-03           | 1.0E+00           | 8.3E-01           | 1.5E-03           | 3.2E-02           |
| 2.0E-03           | COND <sup>i</sup> | COND <sup>i</sup> | 2.7E-03           | 3.9E-02           |
| 3.5E-01           | 3.1E-01           | 4.3E-01           | 1.7E-01           | 3.2E-01           |
| 7.1E-01           | 9.5E-01           | 8.3E-01           | 4.7E-01           | 8.1E-01           |
| 2.1E-03           | 9.4E-01           | 9.4E-01           | 2.8E-03           | 4.1E-02           |
| 2.1E-03           | 9.4E-01           | 9.4E-01           | 2.8E-03           | 4.1E-02           |
| 2.1E-03           | 9.5E-01           | 9.5E-01           | 2.8E-03           | 4.0E-02           |
| 2.5E-05           | 7.9E-01           | 2.6E-03           | 1.1E-06           | 1.6E-05           |

|         |         |         |         |         |
|---------|---------|---------|---------|---------|
| 2.5E-05 | 7.9E-01 | 2.6E-03 | 1.1E-06 | 1.6E-05 |
| 2.1E-03 | 9.7E-01 | 9.7E-01 | 2.8E-03 | 4.0E-02 |
| 9.0E-01 | 3.5E-01 | 7.0E-01 | 8.7E-01 | 2.6E-01 |
| 1.5E-02 | 3.3E-01 | 4.2E-01 | 1.2E-02 | 8.5E-02 |
| 2.5E-01 | 6.4E-01 | 3.0E-02 | 2.8E-02 | 5.5E-02 |
| 8.7E-02 | 1.1E-01 | 6.6E-01 | 2.7E-03 | 4.1E-02 |
| 1.1E-01 | 9.8E-03 | 3.8E-01 | 8.3E-02 | 1.6E-01 |
| 7.8E-01 | 9.8E-01 | 8.6E-01 | 7.9E-01 | 8.8E-01 |
| 8.0E-01 | 9.1E-01 | 7.8E-01 | 7.8E-01 | 8.0E-01 |
| 1.1E-02 | 3.3E-02 | 5.7E-02 | 1.9E-02 | 9.2E-03 |
| 1.6E-02 | 1.1E-01 | 1.9E-01 | 1.6E-02 | 3.3E-02 |
| 1.6E-02 | 1.2E-01 | 1.9E-01 | 1.6E-02 | 3.3E-02 |
| 7.8E-03 | 8.2E-02 | 1.5E-01 | 8.1E-03 | 2.4E-02 |
| 9.7E-03 | 8.0E-02 | 1.4E-01 | 9.5E-03 | 2.2E-02 |
| 1.2E-02 | 9.3E-02 | 1.6E-01 | 1.2E-02 | 2.5E-02 |
| 7.0E-03 | 5.7E-02 | 1.0E-01 | 6.7E-03 | 1.4E-02 |
| 8.6E-03 | 6.7E-02 | 1.2E-01 | 8.2E-03 | 1.7E-02 |
| 7.5E-03 | 6.7E-02 | 1.2E-01 | 6.9E-03 | 1.6E-02 |
| 2.0E-02 | 1.3E-01 | 2.0E-01 | 2.1E-02 | 3.6E-02 |
| 8.9E-03 | 7.0E-02 | 1.3E-01 | 9.2E-03 | 1.9E-02 |
| 4.0E-03 | 5.2E-02 | 9.4E-02 | 4.3E-03 | 1.3E-02 |
| 9.5E-02 | 3.3E-01 | 4.4E-01 | 7.7E-02 | 3.5E-01 |
| 7.9E-02 | 3.6E-01 | 4.4E-01 | 5.9E-02 | 3.3E-01 |
| 9.1E-03 | 7.3E-02 | 1.2E-01 | 8.5E-03 | 1.8E-02 |
| 8.4E-03 | 7.0E-02 | 1.2E-01 | 7.9E-03 | 1.8E-02 |
| 9.1E-02 | 4.0E-01 | 4.7E-01 | 6.9E-02 | 3.6E-01 |
| 7.3E-02 | 2.7E-01 | 3.4E-01 | 5.0E-02 | 2.7E-01 |
| 6.4E-02 | 2.7E-01 | 3.5E-01 | 4.7E-02 | 2.8E-01 |
| 6.1E-02 | 2.6E-01 | 3.4E-01 | 4.5E-02 | 2.7E-01 |
| 6.9E-02 | 3.1E-01 | 3.8E-01 | 4.9E-02 | 3.0E-01 |
| 5.8E-02 | 2.5E-01 | 3.3E-01 | 4.1E-02 | 2.6E-01 |
| 3.8E-02 | 2.1E-01 | 2.8E-01 | 2.9E-02 | 2.1E-01 |
| 6.8E-02 | 2.5E-01 | 3.1E-01 | 4.6E-02 | 2.5E-01 |
| 5.9E-02 | 2.4E-01 | 2.9E-01 | 4.1E-02 | 2.3E-01 |
| 4.6E-02 | 2.4E-01 | 2.7E-01 | 3.3E-02 | 2.1E-01 |
| 8.6E-02 | 3.7E-01 | 4.3E-01 | 6.2E-02 | 3.7E-01 |
| 1.2E-01 | 4.4E-01 | 5.3E-01 | 9.1E-02 | 4.5E-01 |
| 5.5E-01 | 8.6E-01 | 7.7E-01 | 4.9E-01 | 8.5E-01 |
| 2.2E-01 | 7.6E-01 | 8.2E-01 | 1.8E-01 | 7.3E-01 |
| 1.7E-01 | 6.6E-01 | 7.0E-01 | 1.3E-01 | 5.8E-01 |
| 1.0E-01 | 4.6E-01 | 5.2E-01 | 7.0E-02 | 4.1E-01 |
| 1.8E-01 | 6.8E-01 | 7.0E-01 | 1.4E-01 | 6.0E-01 |
| 1.9E-01 | 7.1E-01 | 7.2E-01 | 1.5E-01 | 6.3E-01 |
| 1.1E-01 | 5.5E-01 | 5.2E-01 | 9.9E-02 | 4.3E-01 |
| 8.8E-04 | 1.1E-02 | 6.1E-03 | 3.0E-04 | 1.9E-03 |
| 8.5E-04 | 1.2E-02 | 4.9E-03 | 2.2E-04 | 1.6E-03 |
| 8.2E-04 | 7.4E-03 | 3.4E-03 | 2.1E-04 | 1.2E-03 |
| 2.1E-06 | 3.0E-02 | 2.2E-02 | 5.6E-07 | 1.1E-02 |
| 2.0E-07 | 7.5E-01 | 6.1E-01 | 1.7E-08 | 6.1E-01 |
| 2.3E-07 | 1.0E+00 | 1.0E+00 | 2.0E-08 | 1.0E+00 |
| 1.5E-01 | 8.4E-01 | 8.3E-01 | 1.9E-01 | 6.3E-01 |
| 1.4E-01 | 8.1E-01 | 8.1E-01 | 1.8E-01 | 6.1E-01 |
| 2.3E-07 | 1.0E+00 | 1.0E+00 | 2.0E-08 | 1.0E+00 |
| 1.4E-01 | 8.1E-01 | 8.1E-01 | 1.8E-01 | 6.1E-01 |
| 2.2E-07 | 1.9E-01 | 1.7E-01 | 8.6E-08 | 3.3E-01 |

|         |                   |                   |         |                   |
|---------|-------------------|-------------------|---------|-------------------|
| 2.3E-07 | 1.0E+00           | 1.0E+00           | 2.0E-08 | 1.0E+00           |
| 1.4E-01 | 8.0E-01           | 7.9E-01           | 1.8E-01 | 6.0E-01           |
| 2.3E-07 | COND <sup>i</sup> | COND <sup>i</sup> | 2.0E-08 | COND <sup>i</sup> |
| 2.4E-09 | COND <sup>i</sup> | COND <sup>i</sup> | 5.1E-11 | COND <sup>i</sup> |
| 2.3E-07 | 1.0E+00           | 1.0E+00           | 2.0E-08 | 1.0E+00           |
| 9.0E-02 | 6.6E-01           | 6.3E-01           | 1.3E-01 | 5.2E-01           |
| 2.3E-07 | 1.0E+00           | 1.0E+00           | 2.0E-08 | 1.0E+00           |
| 2.3E-07 | 1.0E+00           | 1.0E+00           | 2.0E-08 | 1.0E+00           |
| 2.3E-07 | 1.0E+00           | 1.0E+00           | 2.0E-08 | 1.0E+00           |
| 2.3E-07 | 1.0E+00           | 1.0E+00           | 2.0E-08 | 1.0E+00           |
| 2.3E-07 | 1.0E+00           | 1.0E+00           | 2.0E-08 | 1.0E+00           |
| 2.1E-07 | 8.2E-01           | 7.8E-01           | 1.7E-08 | 6.1E-01           |
| 6.2E-08 | 3.6E-02           | 7.9E-02           | 8.9E-09 | 7.0E-02           |
| 2.1E-07 | 8.2E-01           | 7.8E-01           | 1.7E-08 | 6.1E-01           |
| 2.1E-07 | 8.2E-01           | 7.8E-01           | 1.7E-08 | 6.1E-01           |
| 2.1E-07 | 8.2E-01           | 7.8E-01           | 1.7E-08 | 6.1E-01           |
| 2.1E-07 | 8.2E-01           | 7.8E-01           | 1.7E-08 | 6.1E-01           |
| 1.2E-08 | 9.4E-01           | 9.2E-01           | 2.9E-10 | 9.9E-01           |
| 1.2E-08 | 9.4E-01           | 9.2E-01           | 2.9E-10 | 9.9E-01           |
| 1.2E-08 | 9.4E-01           | 9.2E-01           | 2.9E-10 | 9.9E-01           |
| 4.9E-05 | 9.4E-05           | 9.2E-05           | 1.8E-05 | 8.3E-06           |
| 8.3E-08 | 8.4E-04           | 2.2E-03           | 5.2E-08 | 3.6E-04           |
| 8.3E-08 | 8.4E-04           | 2.2E-03           | 5.2E-08 | 3.6E-04           |
| 4.0E-08 | 8.1E-01           | 7.8E-01           | 1.2E-09 | 8.3E-01           |
| 4.0E-08 | 8.1E-01           | 7.8E-01           | 1.2E-09 | 8.3E-01           |
| 9.9E-07 | 4.4E-05           | 2.8E-05           | 1.5E-06 | 1.1E-05           |
| 8.6E-07 | 5.2E-05           | 3.1E-05           | 1.4E-06 | 1.1E-05           |

determinants or  
 1 genotyped  
 ng SNPTEST V2  
 ontrolling for HLA

A nomenclature.  
 1 as AA position

00 information
